# Supplementary material for: Using fluorogenic probes for the investigation of selective biomass degradation by fungi
Source: Royal Society of Chemistry journal article supplement (doi:10.1039/c4gc01659a), 2014-12-26

# Using Fluorogenic Probes for the Investigation of Selective Biomass Degradation by Fungi

*Qian Zhang,<sup>†</sup> Xinrui Peng,<sup>†</sup> Michelle Grilley,<sup>‡</sup> Jon Y. Takemoto,<sup>‡</sup> and Cheng-Wei Tom Chang<sup>†,\*</sup>*

<sup>†</sup> Department of Chemistry and Biochemistry, Utah State University, 0300 Old Main Hill, Logan,  
Utah 84322-0300, U.S.A.

<sup>‡</sup> Department of Biology, Utah State University, 5305 Old Main Hill, Logan, Utah 84322-5305,  
U.S.A.

tom.chang@usu.edu

\* To whom correspondence should be addressed. Ph: (435) 797-3545. Fax: 435-797-3390

## Supporting Information

- I. <sup>1</sup>H NMR and <sup>13</sup>C NMR of the Synthesized Compounds (S2-S29)
- II. Incubation of 4MU with Aromatic Compounds (S30)

## I. <sup>1</sup>H NMR, <sup>13</sup>C NMR and Related Spectra for the Synthesized Compounds

| Entry | Compound Name                                                                                                                    | Page |
|-------|----------------------------------------------------------------------------------------------------------------------------------|------|
| 1     | <sup>1</sup> H NMR of Methyl-6- <i>O</i> -(6-Methoxy-2-naphthalenylmethyl)-mannopyronoside (probe 1)                             | S4   |
| 2     | <sup>13</sup> C NMR of Methyl-6- <i>O</i> -(6-Methoxy-2-naphthalenylmethyl)-mannopyronoside (probe 1)                            | S5   |
| 3     | <sup>1</sup> H NMR of Methyl-6-(4-methyl-umbelliferyl)- <i>O</i> - $\alpha$ - <i>D</i> -mannopyranoside (probe 3)                | S6   |
| 4     | <sup>13</sup> C NMR of Methyl-6-(4-methyl-umbelliferyl)- <i>O</i> - $\alpha$ - <i>D</i> -mannopyranoside (probe 3)               | S7   |
| 5     | <sup>1</sup> H NMR of 6-(4-Methyl-umbelliferyl)- <i>O</i> - <i>D</i> -xylofuranose (probe 4)                                     | S8   |
| 6     | <sup>13</sup> C NMR of 6-(4-Methyl-umbelliferyl)- <i>O</i> - <i>D</i> -xylofuranose (probe 4)                                    | S9   |
| 7     | <sup>1</sup> H NMR of 3-(6-Methoxy-2-naphthalenylmethyl)- <i>O</i> - <i>D</i> -xylofurnose (probe 5)                             | S10  |
| 8     | <sup>13</sup> C NMR of 3-(6-Methoxy-2-naphthalenylmethyl)- <i>O</i> - <i>D</i> -xylofurnose (probe 5)                            | S11  |
| 9     | <sup>1</sup> H NMR of 2-((1-(3,4-dimethoxyphenyl)ethoxy)methyl)-6-methoxynaphthalene (probe 10)                                  | S12  |
| 10    | <sup>13</sup> C NMR of 2-((1-(3,4-dimethoxyphenyl)ethoxy)methyl)-6-methoxynaphthalene (probe 10)                                 | S13  |
| 11    | <sup>1</sup> H NMR of 1-(3,4-dimethoxyphenyl)-2-(4-methyl-umbelliferoxy)-ethanone (probe 11)                                     | S14  |
| 12    | <sup>13</sup> C NMR of 1-(3,4-dimethoxyphenyl)-2-(4-methyl-umbelliferoxy)-ethanone (probe 11)                                    | S15  |
| 13    | <sup>1</sup> H NMR of (6-Methoxy-2-naphthalenylmethyl)- $\beta$ - <i>D</i> -glucopyranoside (probe 14)                           | S16  |
| 14    | <sup>13</sup> C NMR of (6-Methoxy-2-naphthalenylmethyl)- $\beta$ - <i>D</i> -glucopyranoside (probe 14)                          | S17  |
| 15    | <sup>1</sup> H NMR of (6-Methoxy-2-naphthalenylmethyl)- $\beta$ - <i>D</i> -xylopyranoside (probe 16)                            | S18  |
| 16    | <sup>13</sup> C NMR of (6-Methoxy-2-naphthalenylmethyl)- $\beta$ - <i>D</i> -xylopyranoside (probe 16)                           | S19  |
| 17    | <sup>1</sup> H NMR of (6-Methoxy-2-naphthalenylmethyl)- $\beta$ - <i>D</i> -cellubioside (probe 17)                              | S20  |
| 18    | <sup>13</sup> C NMR of (6-Methoxy-2-naphthalenylmethyl)- $\beta$ - <i>D</i> -cellubioside (probe 17)                             | S21  |
| 19    | <sup>1</sup> H NMR of (6-Methoxy-2-naphthalenylmethyl)-2,3,4,6-tetra- <i>O</i> -acetyl- $\beta$ - <i>D</i> -glucopyranoside (8)  | S22  |
| 20    | <sup>13</sup> C NMR of (6-Methoxy-2-naphthalenylmethyl)-2,3,4,6-tetra- <i>O</i> -acetyl- $\beta$ - <i>D</i> -glucopyranoside (8) | S23  |

| Entry | Compound Name                                                                                                                   | Page |
|-------|---------------------------------------------------------------------------------------------------------------------------------|------|
| 21    | <sup>1</sup> H NMR of (6-Methoxy-2-naphthalenylmethyl)-2,3,4,- <i>tri-O</i> -acetyl-D-xylopyranoside (10)                       | S24  |
| 22    | <sup>13</sup> C NMR of (6-Methoxy-2-naphthalenylmethyl)-2,3,4,- <i>tri-O</i> -acetyl-D-xylopyranoside (10)                      | S25  |
| 23    | <sup>1</sup> H NMR of Methyl-2,3,4-Tri-benzoyl- <i>O</i> -6-(6-Methoxy-2-naphthalenylmethyl)- $\alpha$ -D-mannopyranoside (13)  | S26  |
| 24    | <sup>13</sup> C NMR of Methyl-2,3,4-Tri-benzoyl- <i>O</i> -6-(6-Methoxy-2-naphthalenylmethyl)- $\alpha$ -D-mannopyranoside (13) | S27  |
| 25    | <sup>1</sup> H NMR of 1,2- <i>O</i> -isopropylidene-6-(4-methyl-umbelliferyl)- <i>O</i> - $\alpha$ -D-xylofuranose (16)         | S28  |
| 26    | <sup>13</sup> C NMR of 1,2- <i>O</i> -isopropylidene-6-(4-methyl-umbelliferyl)- <i>O</i> - $\alpha$ -D-xylofuranose (16)        | S29  |

1H NMR of Methyl-6-O-(6-Methoxy-2-naphthalenylmethyl)-mannopyranoside (probe 1)

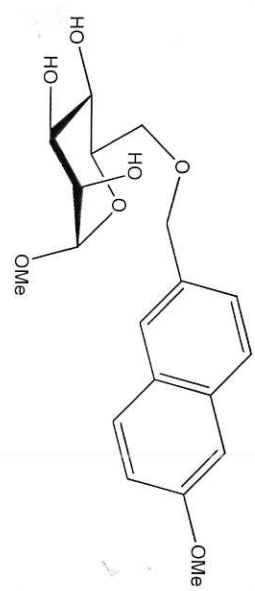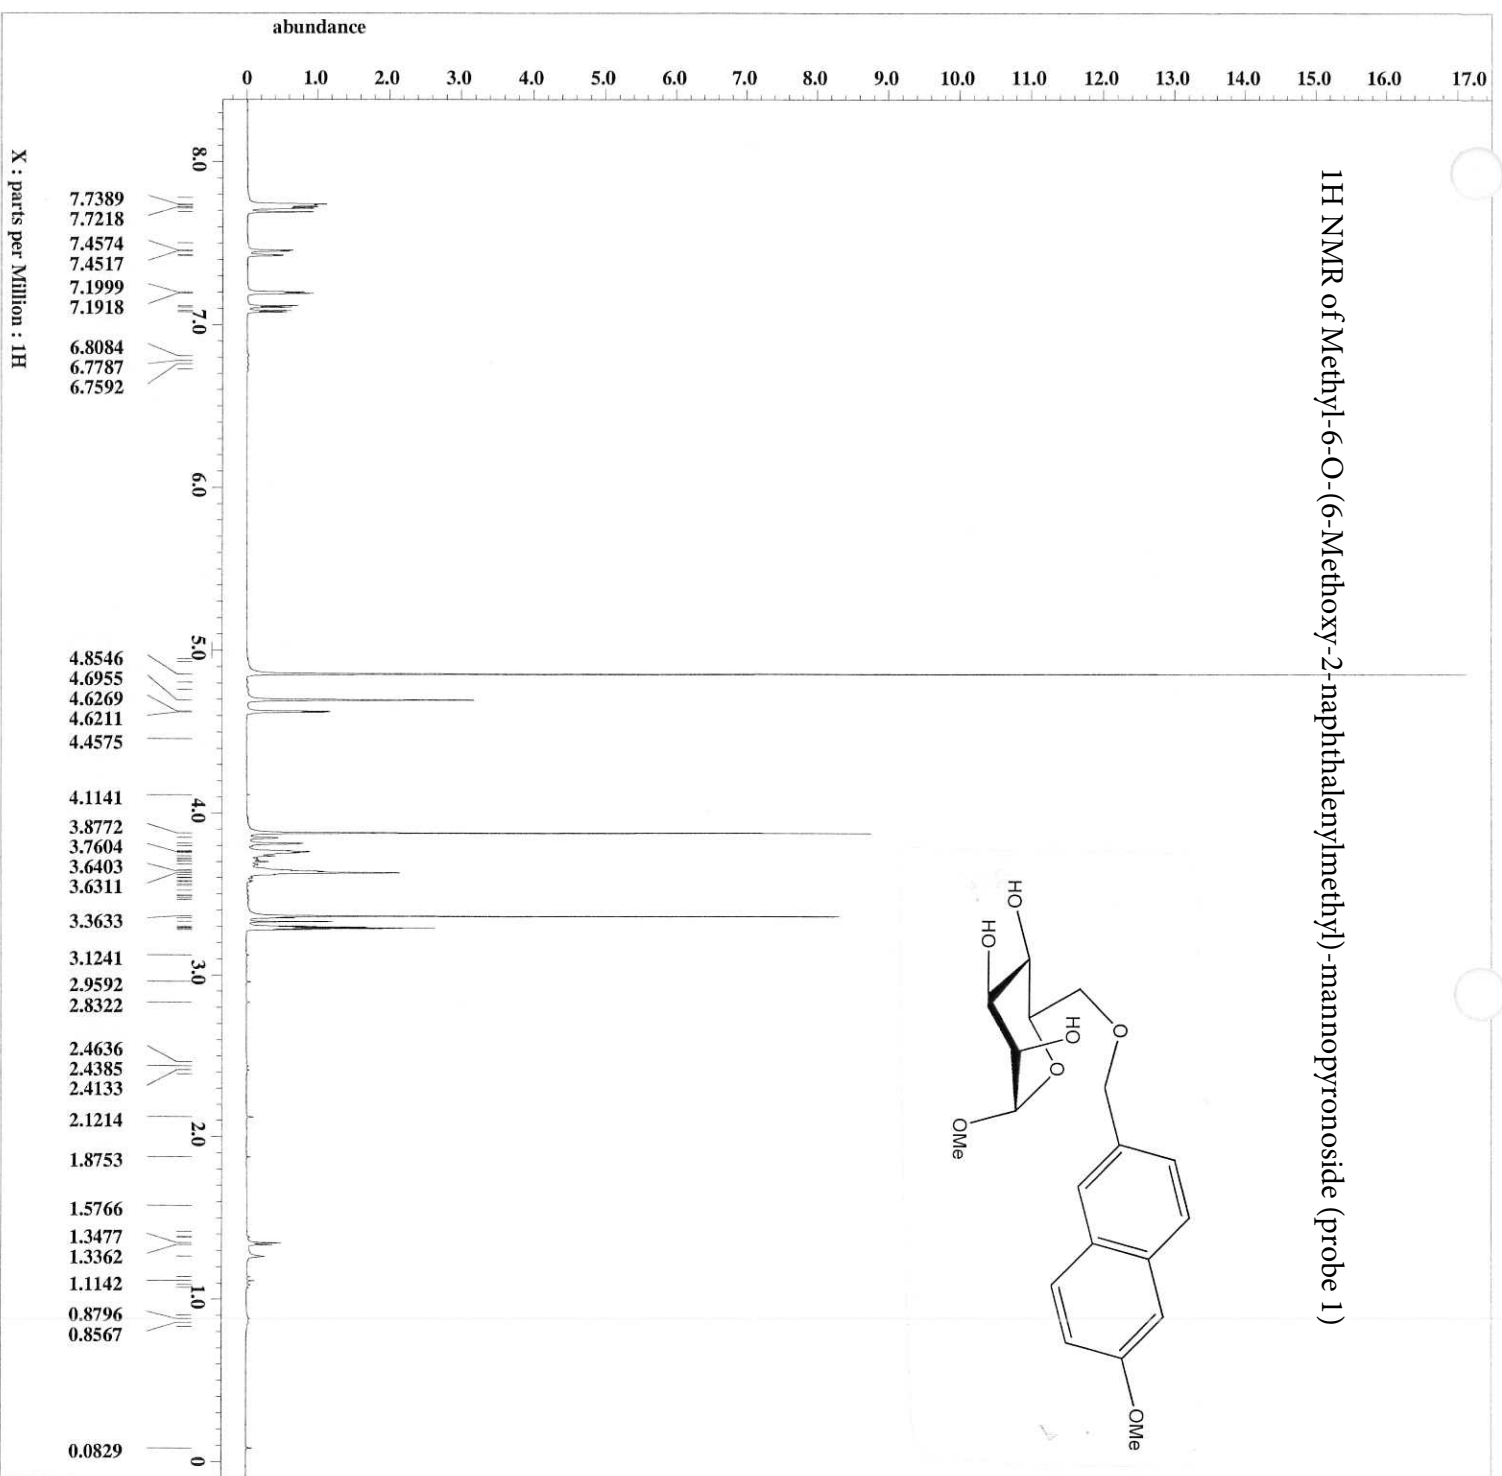

X : parts per Million : 1H

```

Filename = 04031202-111-54single
Author = qzhang
Experiment = single_pulse.ex2
Sample_id = 04031202-111-54single
Solvent = METHANOL-D3
Creation_time = 3-APR-2012 14:45:08
Revision_time = 4-APR-2012 09:54:14
Current_time = 4-APR-2012 09:54:23

Comment = single_pulse
Data_format = 1D COMPLEX
Dim_size = 13107
Dim_title = 1H
Dim_units = [ppm]
Dimensions = X
Site = ECX 300
Spectrometer = ECX-300

Field_strength = 7.05860131[T] (300[MHZ]
X_acq_duration = 2.90717696[ls]
X_domain = 1H
X_freq = 300.52965592[MHz]
X_offset = 5[ppm]
X_points = 16384
X_prescans = 1
X_resolution = 0.34397631[Hz]
X_sweep = 5.63570784[KHz]
Irr_domain = 1H
Irr_freq = 300.52965592[MHz]
Irr_offset = 5[ppm]
Tri_domain = 1H
Tri_freq = 300.52965592[MHz]
Tri_offset = 5[ppm]
Clipped = FALSE
Mod_return = 1
Scans = 8
Total_scans = 8

X_90_width = 13.43[us]
X_acq_time = 2.90717696[ls]
X_angle = 45[deg]
X_atn = 3[db]
X_pulse = 6.715[us]
Irr_mode = Off
Tri_mode = Off
Dante_preset = FALSE
Initial_wait = 1[ls]
Recvr_gain = 44
Relaxation_delay = 5[ls]
Repetition_time = 7.90717696[ls]
Temp_get = 23[dc]
  
```

ppm

- 158.255
- 134.757
- 133.710
- 129.324
- 129.160
- 127.051
- 126.700
- 126.632
- 118.844
- 105.680
- 101.814
- 73.660
- 72.405
- 71.648
- 71.0
- 70.086
- 67.759
- 54.723
- 54.289
- 48.638
- 48.426
- 48.213
- 48.001
- 47.787
- 47.574
- 47.362
- 29.455

<sup>13</sup>C NMR of Methyl-6-O-(6-Methoxy-2-naphthalenylmethyl)-mannopyranoside (probe 1)

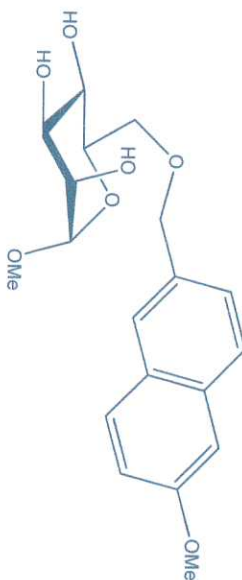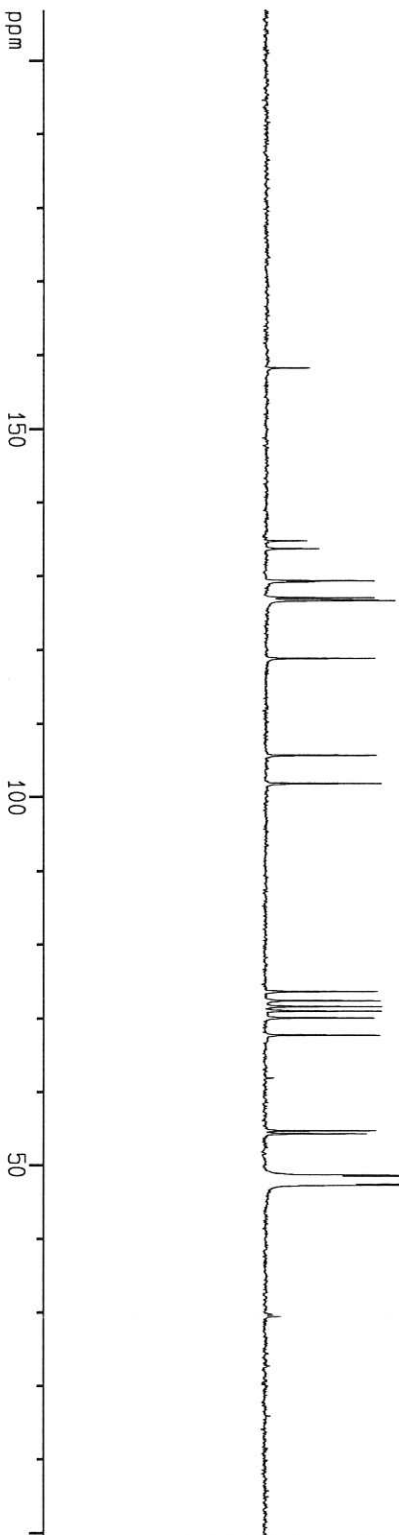

Current Data Parameters  
 NAME 02-III-54  
 EXPNO 9  
 PROCNO 1

F2 - Acquisition Parameters  
 Date\_ 500000  
 Time 16.54  
 INSTRUM brx400  
 PROBHD 5 mm Multinuc1  
 PULPROG zgpg30  
 TD 32768  
 SOLVENT D2O  
 NS 9460  
 DS 32  
 SMH 20833.334 Hz  
 FIDRES 0.635763 Hz  
 AQ 0.7864820 sec  
 RG 32768  
 DW 24.000 usec  
 DE 34.29 usec  
 TE 298.0 K  
 D12 0.00002000 sec  
 D15 21.40 dB  
 CPYPRG waltz16  
 P31 90.00 usec  
 D1 0.50000000 sec  
 P1 6.75 usec  
 DE 34.29 usec  
 SF01 100.6231179 MHz  
 NUCLEUS 13C  
 D11 0.03000000 sec

F2 - Processing parameters  
 SI 16384  
 SF 100.6127290 MHz  
 MDW EM  
 SSB 0  
 LB 5.00 Hz  
 GB 0  
 PC 1.00

1D NMR plot parameters  
 CX 20.00 cm  
 F1p 206.789 ppm  
 F1 20805.56 Hz  
 F2p -0.276 ppm  
 F2 -27.78 Hz  
 PPMCM 10.35323 ppm/cm  
 HZCM 1041.66675 Hz/cm

1H NMR of Methyl-6-(4-methyl-umbelliferyl)-O- $\alpha$ -D-mannopyranoside (probe 3)

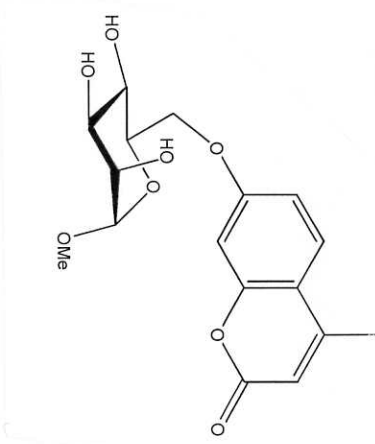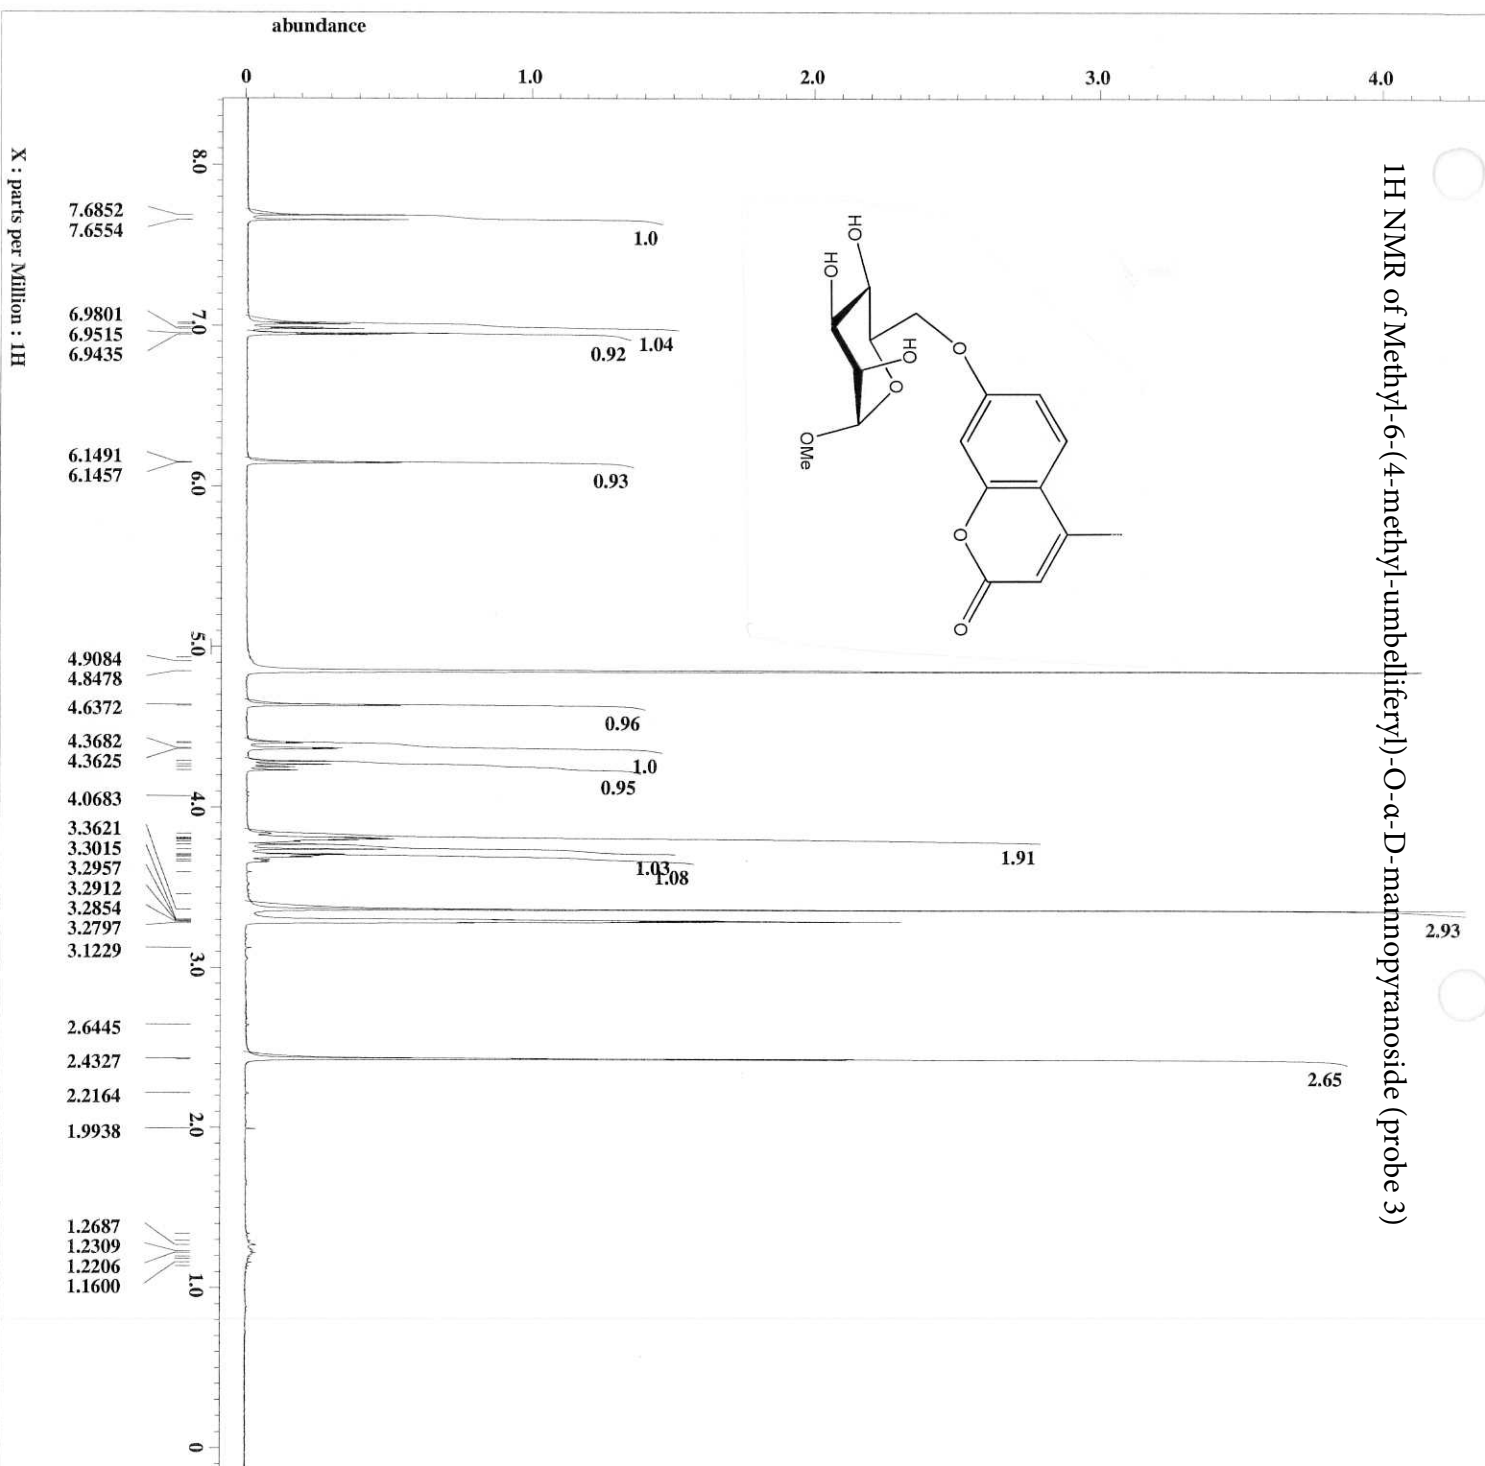

X : parts per Million : 1H

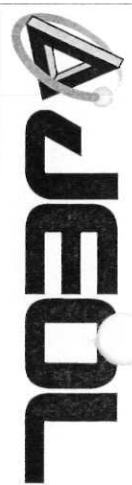

```

Filename = 040512QZ-II-231Csing1
Author = qzhang
Experiment = single_pulse.ex2
Sample_id = 040512QZ-II-231Csing1
Solvent = METHANOL-D3
Creation_time = 5-Apr-2012 14:58:29
Revision_time = 5-Apr-2012 14:56:07
Current_time = 5-Apr-2012 14:56:21

Comment = single_pulse
Data_format = 1D COMPLEX
Dim_size = 13107
Dim_title = 1H
Dim_units = [ppm]
Dimensions = X
Site = ECX 300
Spectrometer = ECX-300

Field_strength = 7.0586013[GT] (300 [MHz]
X_acq_duration = 2.90717696[ls]
X_domain = 1H
X_freq = 300.52965592[MHz]
X_offset = 5[ppm]
X_points = 16384
X_prescans = 1
X_resolution = 0.34397631[Hz]
X_sweep = 5.63570784[KHz]
Irr_domain = 1H
Irr_freq = 300.52965592[MHz]
Irr_offset = 5[ppm]
Irr_domain = 1H
Tri_freq = 300.52965592[MHz]
Tri_offset = 5[ppm]
Mod_return = FALSE
Scans = 1
Total_scans = 8

X_90_width = 13.43[us]
X_acq_time = 2.90717696[ls]
X_angle = 45[deg]
X_atn = 3[dB]
X_pulse = 6.715[us]
Irr_mode = Off
Tri_mode = Off
Dante_presat = FALSE
Initial_wait = 1[ls]
Recvr_gain = 46
Relaxation_delay = 5[ls]
Repetition_time = 7.90717696[ls]
Temp_get = 23[degC]
    
```

<sup>13</sup>C NMR of Methyl-6-(4-methyl-umbelliferyl)-O- $\alpha$ -D-mannopyranoside (probe 3)

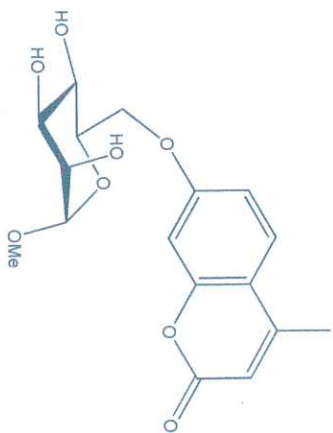

ppm

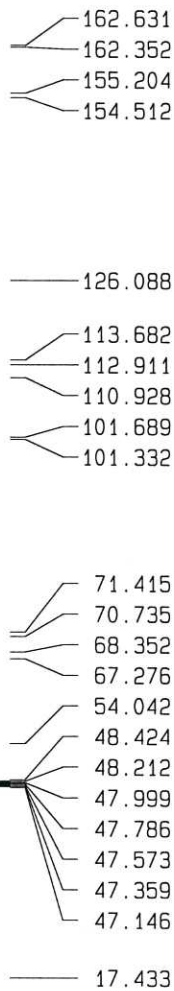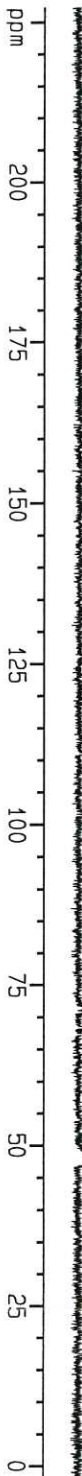

Current Data Parameters  
 NAME QZ-II-231  
 EXPNO 1  
 PROCNO 1

F2 - Acquisition Parameters  
 Date\_ 500000  
 Time 16.33  
 INSTRUM brx400  
 PROBDH 5 mm Multinuc1  
 PULPROG zgpg30  
 TD 32768  
 SOLVENT MeOH  
 NS 16547  
 DS 2  
 SMH 25000.000 Hz  
 FIDRES 0.762939 Hz  
 AQ 0.6554100 sec  
 RG 45500  
 DM 20.000 usec  
 DE 27.14 usec  
 TE 300.0 K  
 D12 0.00002000 sec  
 DL5 20.00 dB  
 CPDPRG6 waltz16  
 P31 100.00 usec  
 D1 0.40000001 sec  
 P1 6.75 usec  
 DE 27.14 usec  
 SFO1 100.6231179 MHz  
 NUCLEUS <sup>13</sup>C  
 D11 0.03000000 sec

F2 - Processing parameters  
 SI 15384  
 SF 100.6127490 MHz  
 MDW EM  
 SSB 0  
 LB 2.00 Hz  
 GB 0  
 PC 1.40

1D NMR plot parameters  
 CX 20.00 cm  
 F1P 227.296 ppm  
 F1 22968.89 Hz  
 F2P -10.000 ppm  
 F2 -1006.13 Hz  
 PPMCM 11.86481 ppm/cm  
 HZCM 1193.75122 Hz/cm

1H NMR of 6-(4-Methyl-umbelliferyl)-O-D-xylofuranose (probe 4)

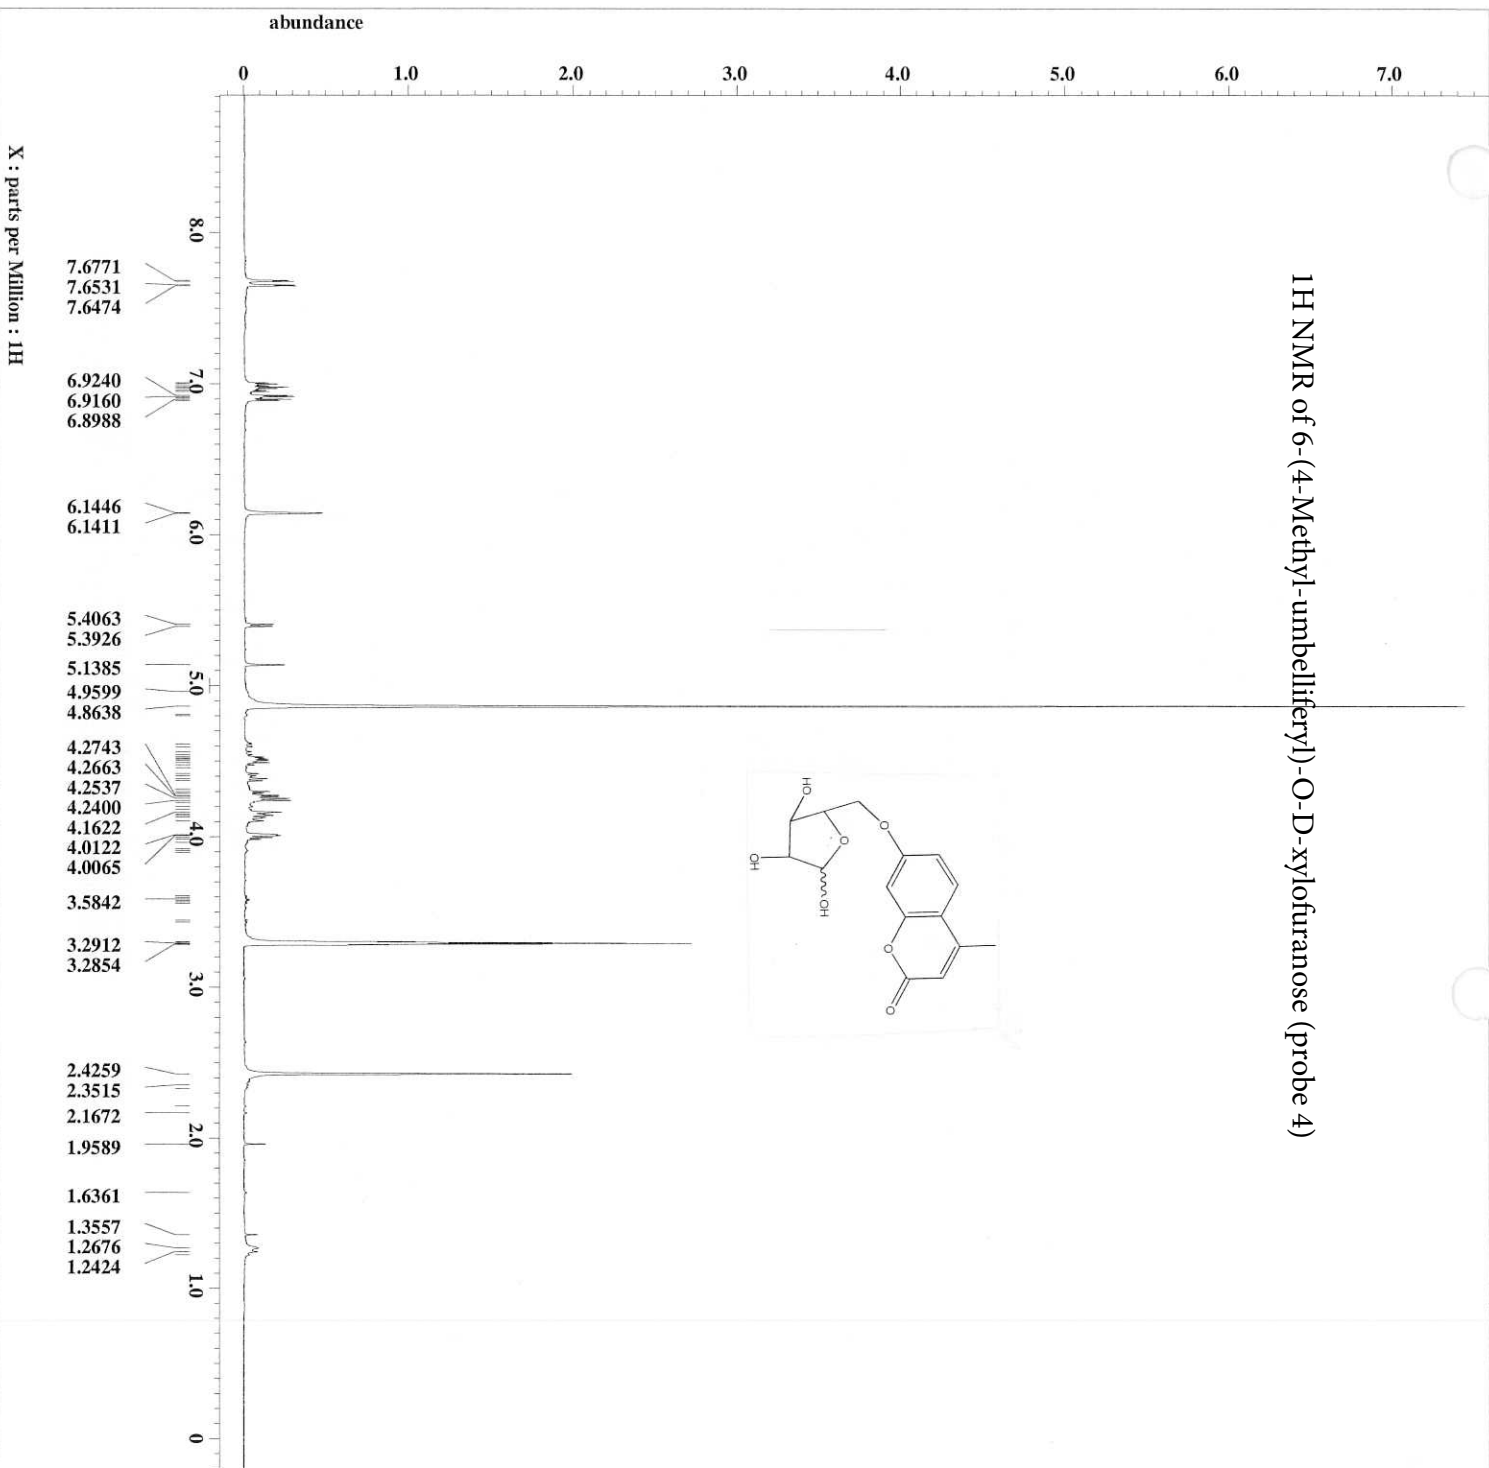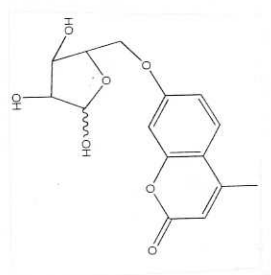

```

Filename = 021413QZ-IV-24Fsingle
Author = qzhang
Experiment = single_pulse.ex2
Sample_id = 021413QZ-IV-24Fsingle
Solvent = METHANOL-D3
Creation_time = 14-FEB-2013 09:26:23
Revision_time = 14-FEB-2013 09:48:17
Current_time = 14-FEB-2013 09:48:22

Comment = single_pulse
Data_format = 1D COMPLEX
Dim_size = 13107
Dim_title = 1H
Dim_units = [ppm]
Dimensions = X
Site = ECK 300
Spectrometer = ECK-300

Field_strength = 7.0586013[T] (300[MHz]
K_acq_duration = 2.90717696[s]
K_domain = 1H
K_freq = 300.52965592[MHz]
K_offset = 51[ppm]
K_points = 16384
K_prescans = 1
K_resolution = 0.34397631[Hz]
K_sweep = 5.63570784[KHz]
Irr_domain = 1H
Irr_freq = 300.52965592[MHz]
Irr_offset = 51[ppm]
Tri_domain = 1H
Tri_freq = 300.52965592[MHz]
Tri_offset = 51[ppm]
Clipped = FALSE
Mod_return = 1
Total_scans = 8

X_90_width = 13.43[us]
K_acq_time = 2.90717696[s]
K_angle = 45[deg]
K_atn = 31[db]
K_pulse = 6.715[us]
Irr_mode = OFF
Tri_mode = OFF
Pulse_program = DANTE_preset
Initial_wait = 1[s]
Recvr_gain = 46
Relaxation_delay = 5[s]
Repetition_time = 7.90717696[s]
Temp_get = 21.6[degC]
  
```



ppm

### 13C NMR of 6-(4-Methyl-umbelliferyl)-O-D-xylofuranose (probe 4)

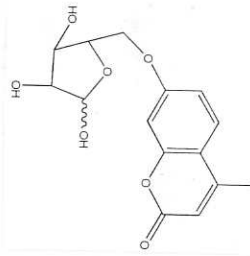

- 162.561
- 162.350
- 155.183
- 154.513
- 126.094
- 113.703
- 112.775
- 110.938
- 103.267
- 101.268
- 96.842
- 81.097
- 80.204
- 77.007
- 76.893
- 75.956
- 75.822
- 68.640
- 67.915
- 48.431
- 48.218
- 48.005
- 47.793
- 47.580
- 47.368
- 47.155
- 17.445

ppm

Current Data Parameters  
 NAME 02-IV-24-F1C13  
 EXPNO 9  
 PROCNO 1

F2 - Acquisition Parameters  
 Date\_ 500000  
 Time 18.35  
 INSTRUM arx400  
 PROBHD 5 mm Multinucl  
 PULPROG zgpg30  
 TD 32768  
 SOLVENT MeOH  
 NS 15487  
 DS 2  
 SMH 25000.000 Hz  
 FIDRES 0.762939 Hz  
 AQ 0.6554100 sec  
 RG 45500  
 DW 20.000 usec  
 DE 27.14 usec  
 TE 300.0 K  
 D12 0.00002000 sec  
 DLS 20.00 dB  
 CPOPRG waltz16  
 P31 100.00 usec  
 D1 0.40000001 sec  
 P1 6.75 usec  
 DE 27.14 usec  
 SF01 100.6231179 MHz  
 NUCLEUS 13C  
 D11 0.03000000 sec

F2 - Processing parameters  
 SI 16384  
 SF 100.6127490 MHz  
 MDW EM  
 SSB 0  
 LB 2.00 Hz  
 GB 0  
 PC 1.40

1D NMR plot parameters  
 CX 20.00 cm  
 F1P 225.290 ppm  
 F1 22667.08 Hz  
 F2P -15.164 ppm  
 F2 -1525.65 Hz  
 PPMCM 12.02270 ppm/cm  
 HZCM 1209.63672 Hz/cm

## 1H NMR of 3-(6-Methoxy-2-naphthalenylmethyl)-O-D-xylofuranose (probe 5)

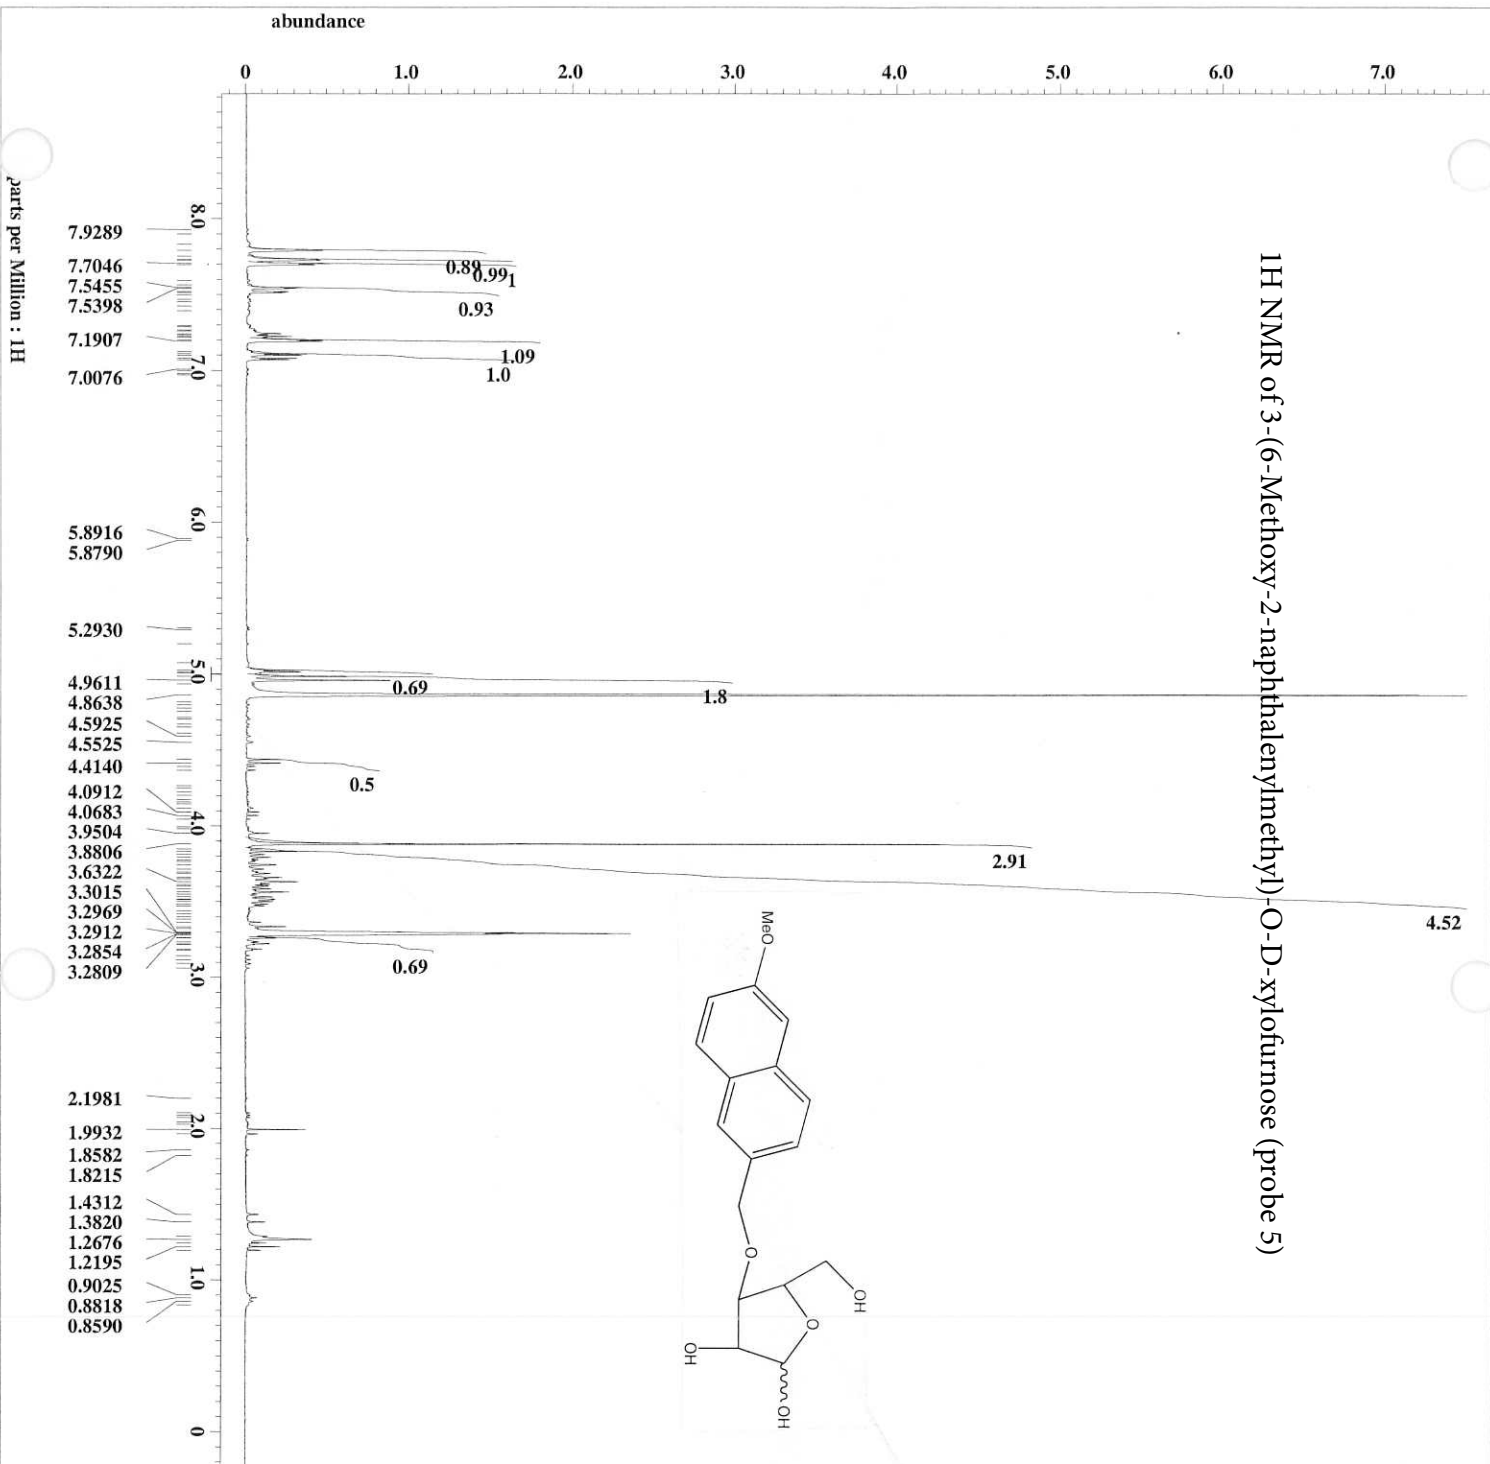

```

Filename = 021413QZ-IV-32single_
Author = qzhang
Experiment = single_pulse.ex2
Sample_id = 021413QZ-IV-32single_
Solvent = METHANOL-D3
Creation_time = 14-FEB-2013 09:19:18
Revision_time = 14-FEB-2013 09:45:31
Current_time = 14-FEB-2013 09:45:45

Comment = single_pulse
Data_format = 1D COMPLEX
Dim_size = 13107
Dim_title = 1H
Dim_units = [ppm]
Dimensions = ECX 300
Site = ECX-300
Spectrometer = ECK-300

Field_strength = 7.0586013[TR] (300 [MHZ]
X_acq_duration = 2.90717696[ls]
X_domain = 1H
X_freq = 300.52965592[MHz]
X_offset = 51[ppm]
X_points = 16384
X_prescans = 1
X_resolution = 0.34397631[Hz]
X_sweep = 5.63570784[kHz]
Irr_domain = 1H
Irr_freq = 300.52965592[MHz]
Irr_offset = 51[ppm]
Irr_domain = 1H
Tri_freq = 300.52965592[MHz]
Tri_offset = 51[ppm]
Clipped = FALSE
Mod_return = 1
Scans = 8
Total_scans = 8

X_90_width = 13.43[us]
X_acq_time = 2.90717696[ls]
X_angle = 45[deg]
X_atn = 3[dB]
X_pulse = 6.715[us]
Irr_mode = Off
Tri_mode = Off
Dante_preset = FALSE
Initial_wait = 1[ls]
Recv_gain = 46
Relaxation_delay = 5[ls]
Repetition_time = 7.90717696[ls]
Temp_get = 21.6[degC]
  
```

<sup>13</sup>C NMR of 3-(6-Methoxy-2-naphthalenylmethyl)-O-D-xylofuranose (probe 5)

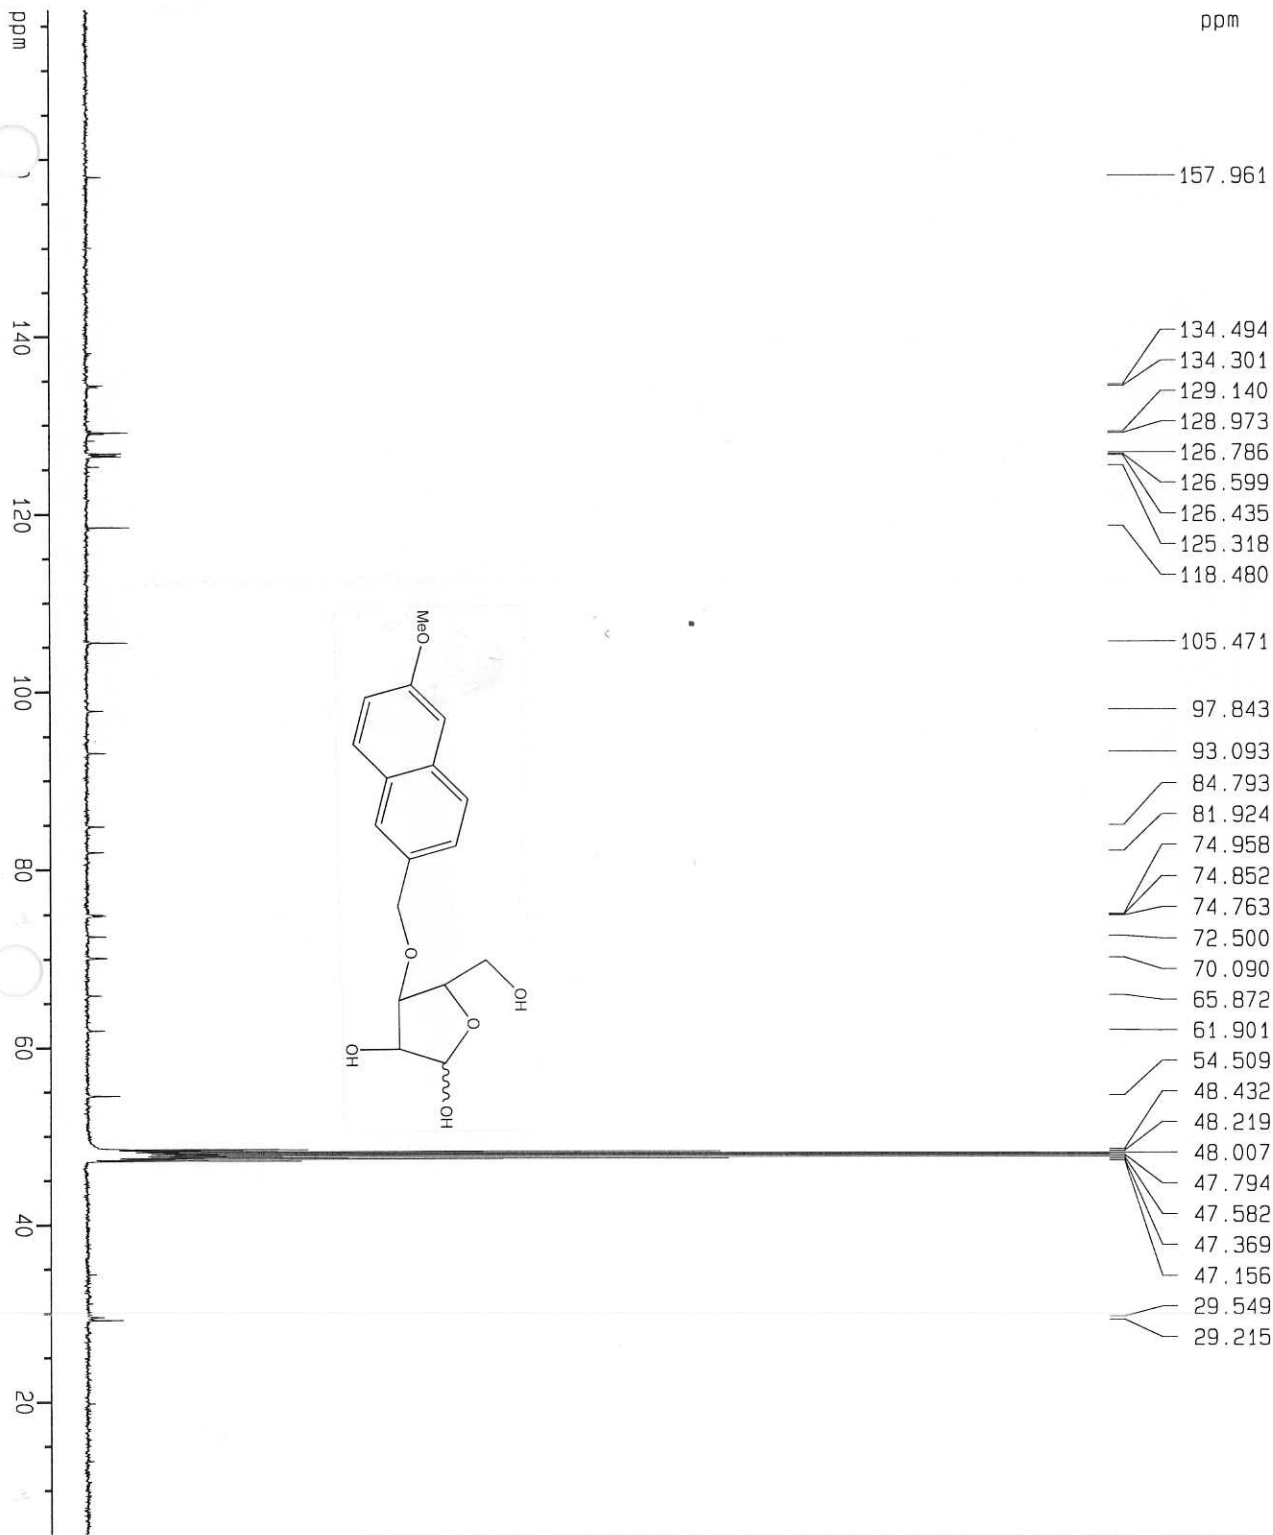

Current Data Parameters  
 NAME GZ-IV-39  
 EXPNO 9  
 PROCNO 1

F2 - Acquisition Parameters  
 Date\_ 500000  
 Time 12.28  
 INSTRUM aprx400  
 PROBHD 5 mm Multinuc1  
 PULPROG zgpg30  
 TD 32768  
 SOLVENT MeOH  
 NS 5422  
 DS 2  
 SMH 25000.000 Hz  
 FIDRES 0.762939 Hz  
 AQ 0.8554100 sec  
 RG 45500  
 DW 20.000 usec  
 DE 27.14 usec  
 TE 300.0 K  
 D12 0.00002000 sec  
 DLS 20.00 dB  
 CPDPRG waitz16  
 P31 100.00 usec  
 D1 0.40000001 sec  
 P1 6.75 usec  
 DE 27.14 usec  
 SF01 100.6231179 MHz  
 NUCLEUS 13C  
 D11 0.03000000 sec

F2 - Processing parameters  
 SI 16384  
 SF 100.6127450 MHz  
 KDK EM  
 SSB 0  
 LB 2.00 Hz  
 GB 0  
 PC 1.40

1D NMR plot parameters  
 CX 20.00 cm  
 F1P 176.793 ppm  
 F1 17787.59 Hz  
 F2P 5.081 ppm  
 F2 511.17 Hz  
 PPMCKM 8.58550 ppm/cm  
 HZCM 863.82104 Hz/cm

## 1H NMR of 2-((1-(3,4-dimethoxyphenyl)ethoxy)methyl)-6-methoxynaphthalene (probe 10)

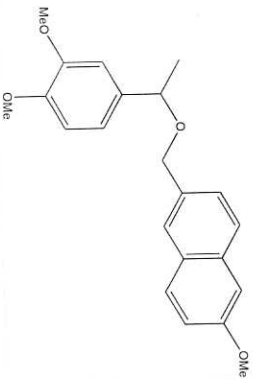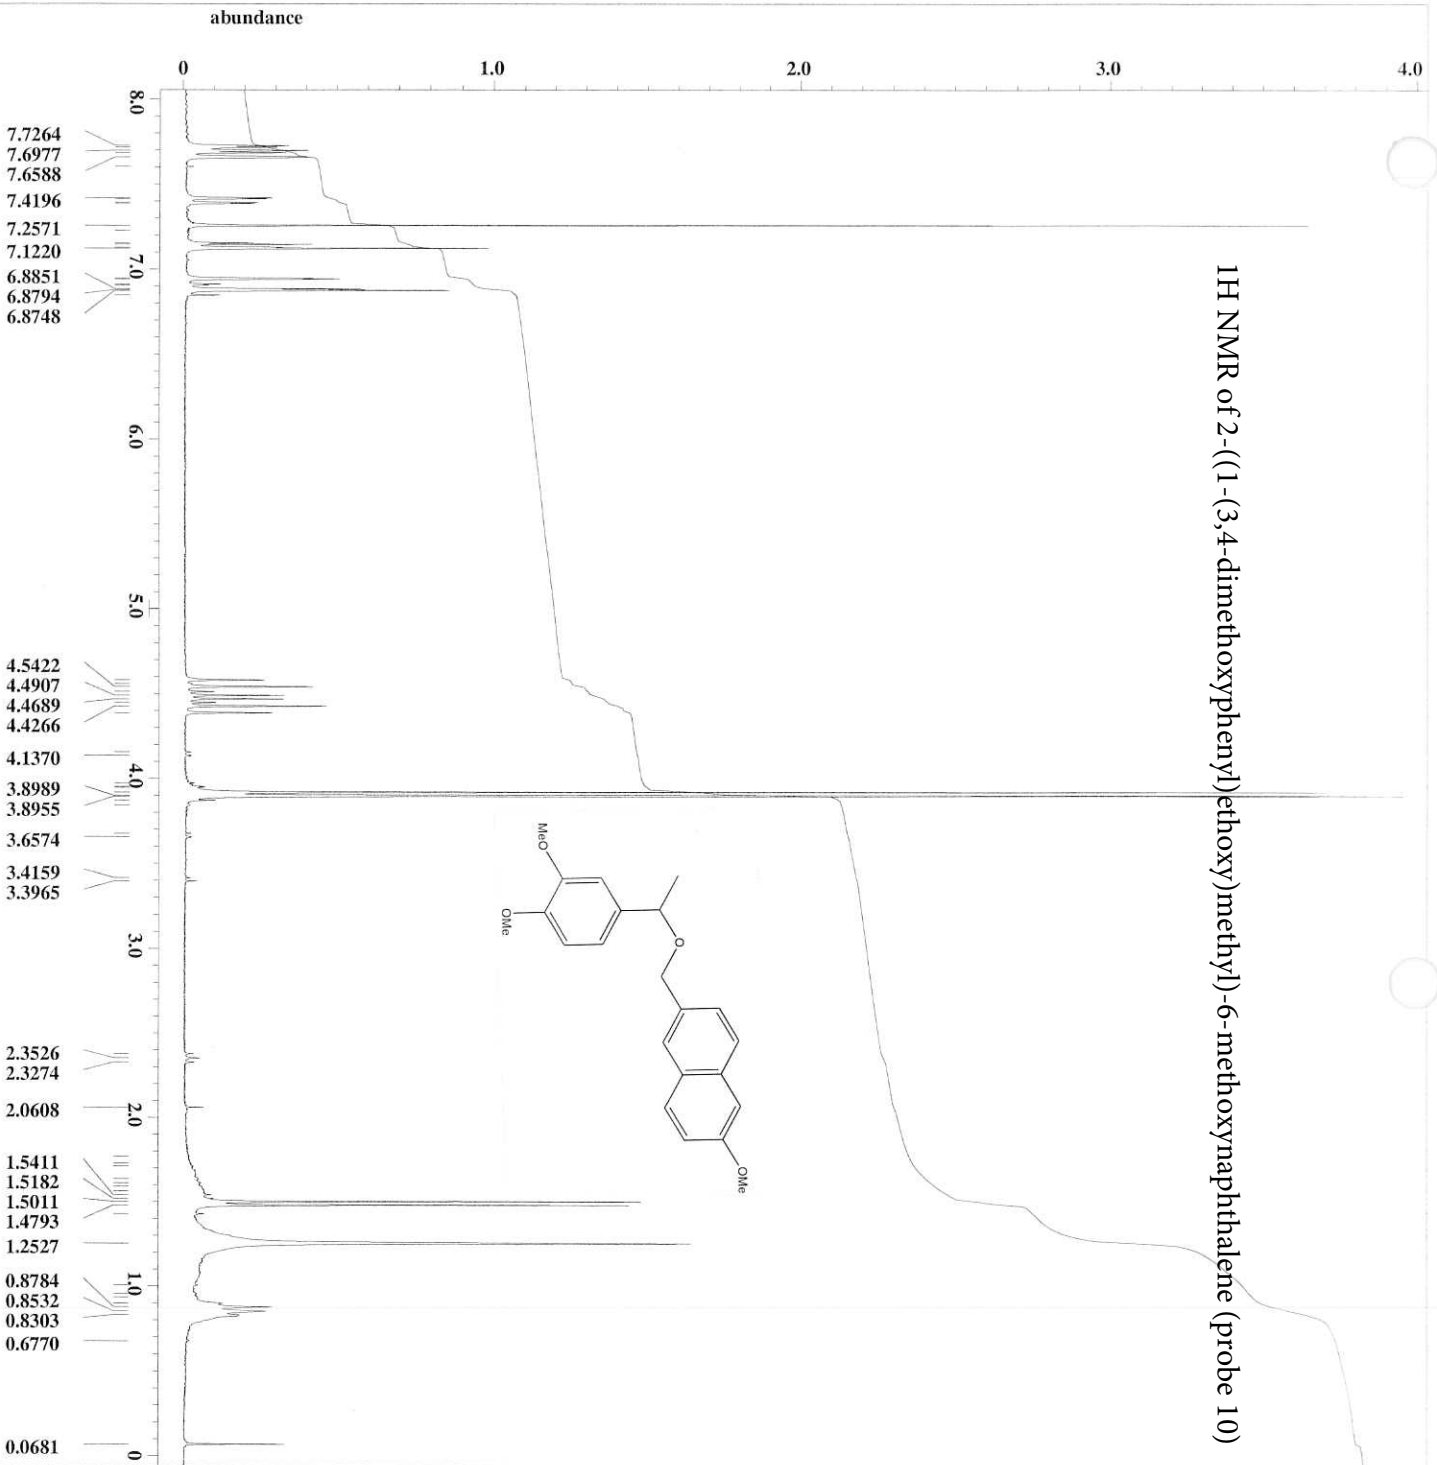

```

Filename = 0613120Z-111-113Bsing
Author = qzhang
Experiment = single_pulse.ex2
Sample_id = 0613120Z-111-113Bsing
Solvent = CHLOROFORM-D
Creation_time = 13-JUN-2012 11:21:28
Revision_time = 13-JUN-2012 11:19:07
Current_time = 13-JUN-2012 11:19:10

Comment = single_pulse
Data_format = 1D COMPLEX
Dim_size = 13107
Dim_title = 1H
Dim_units = [ppm]
Dimensions = X
Site = ECX 300
Spectrometer = ECX-300

Field_strength = 7.0586013[G] (300[MHz]
X_acq_duration = 2.90717696[ls]
X_domain = 1H
X_freq = 300.52965592[MHz]
X_offset = 5[ppm]
X_points = 16384
X_prescans = 1
X_resolution = 0.34397631[Hz]
X_sweep = 5.63570784[KHz]
Irr_domain = 1H
Irr_freq = 300.52965592[MHz]
Irr_offset = 5[ppm]
Irr_domain = 1H
Tri_freq = 300.52965592[MHz]
Tri_offset = 5[ppm]
Clipped = FALSE
Mod_return = 1
Scans = 8
Total_scans = 8

X_90_width = 13.43[us]
X_acq_time = 2.90717696[ls]
X_angle = 45[deg]
X_atn = 3[db]
X_pulse = 6.715[us]
Irr_mode = Off
Tri_mode = Off
Dante_presat = FALSE
Initial_wait = 1[ls]
Recvr_gain = 48
Relaxation_delay = 5[ls]
Repetition_time = 7.90717696[ls]
Temp_get = 23.2[degC]
  
```

X : parts per Million : 1H

<sup>13</sup>C NMR of 2-((1-(3,4-dimethoxyphenyl)ethoxy)methyl)-6-methoxynaphthalene (probe 10)

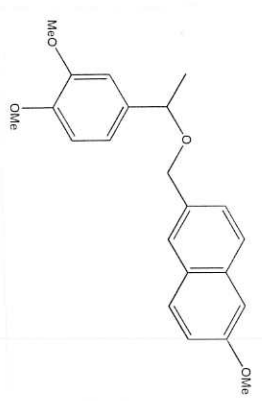

- 157.835
- 149.421
- 148.616
- 136.515
- 134.285
- 133.980
- 129.521
- 128.959
- 127.186
- 126.804
- 126.703
- 119.037
- 111.090
- 109.338
- 105.904
- 77.536
- 77.427
- 77.219
- 77.037
- 76.901
- 70.506
- 56.131
- 55.500
- 32.141
- 29.914
- 24.417
- 22.907

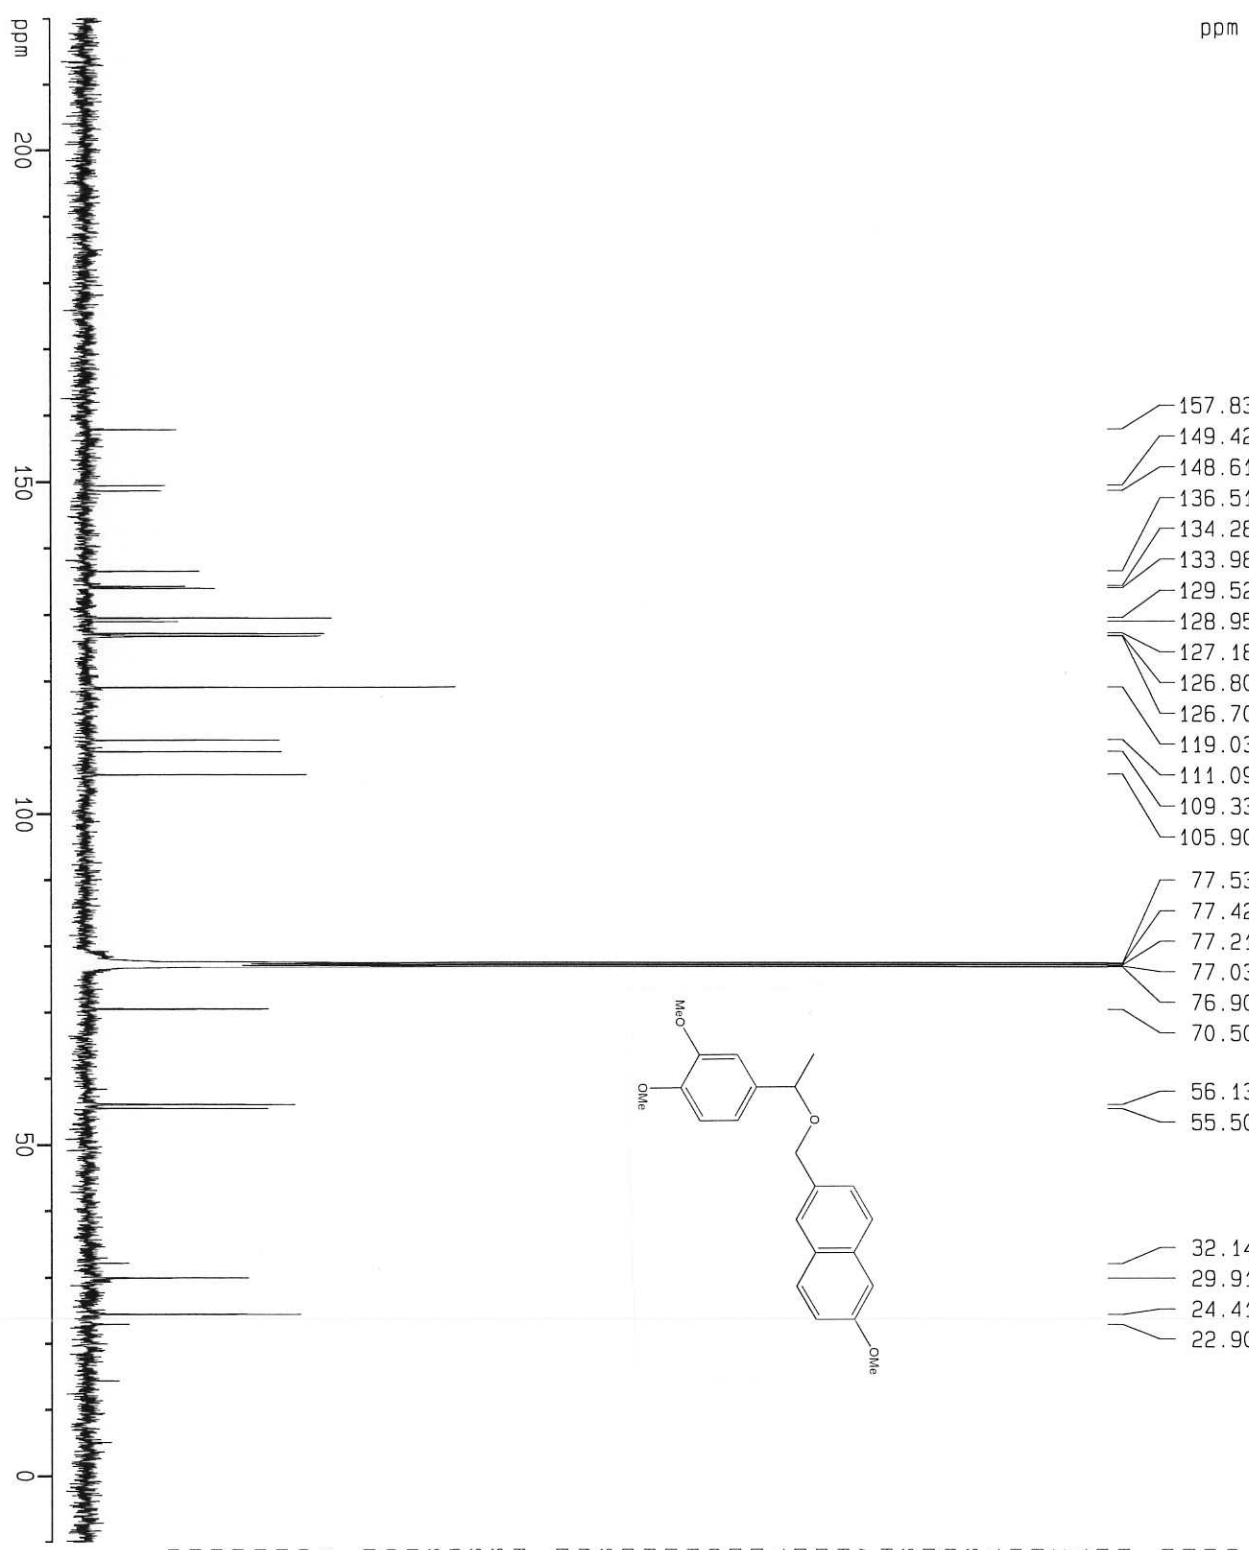

Current Data Parameters  
 NAME 02-III-113B  
 EXPNO 9  
 PROCNO 1

F2 - Acquisition Parameters  
 Date\_ 500000  
 Time 17.22  
 INSTRUM arx400  
 PROBHD 5 mm Multinuc1  
 PULPROG zgpg30  
 TD 32768  
 SOLVENT CDCl3  
 NS 15007  
 DS 2  
 SMH 25000.000 Hz  
 FIDRES 0.762939 Hz  
 AQ 0.6554100 sec  
 RG 45500  
 DW 20.000 usec  
 DE 27.14 usec  
 TE 300.0 K  
 D12 0.00002000 sec  
 DL5 20.00 dB  
 CPDPRG waltz16  
 P31 100.00 usec  
 D1 0.40000001 sec  
 P1 6.75 usec  
 DE 27.14 usec  
 SFO1 100.6231179 MHz  
 NUCLEUS 13C  
 D11 0.030000000 sec

F2 - Processing parameters  
 SI 16384  
 SF 100.6127490 MHz  
 MDW EK  
 SSB 0  
 LB 2.00 Hz  
 GB 0  
 PC 1.40

1D NMR plot parameters  
 CX 20.00 cm  
 F1P 220.000 ppm  
 F1 22134.80 Hz  
 F2P -10.000 ppm  
 F2 -1006.13 Hz  
 PPMCM 11.50000 ppm/cm  
 HZCM 1157.04653 Hz/cm

1H NMR of 1-(3,4-dimethoxyphenyl)-2-(4-methyl-umbelliferoyl)-ethanone (probe 11)

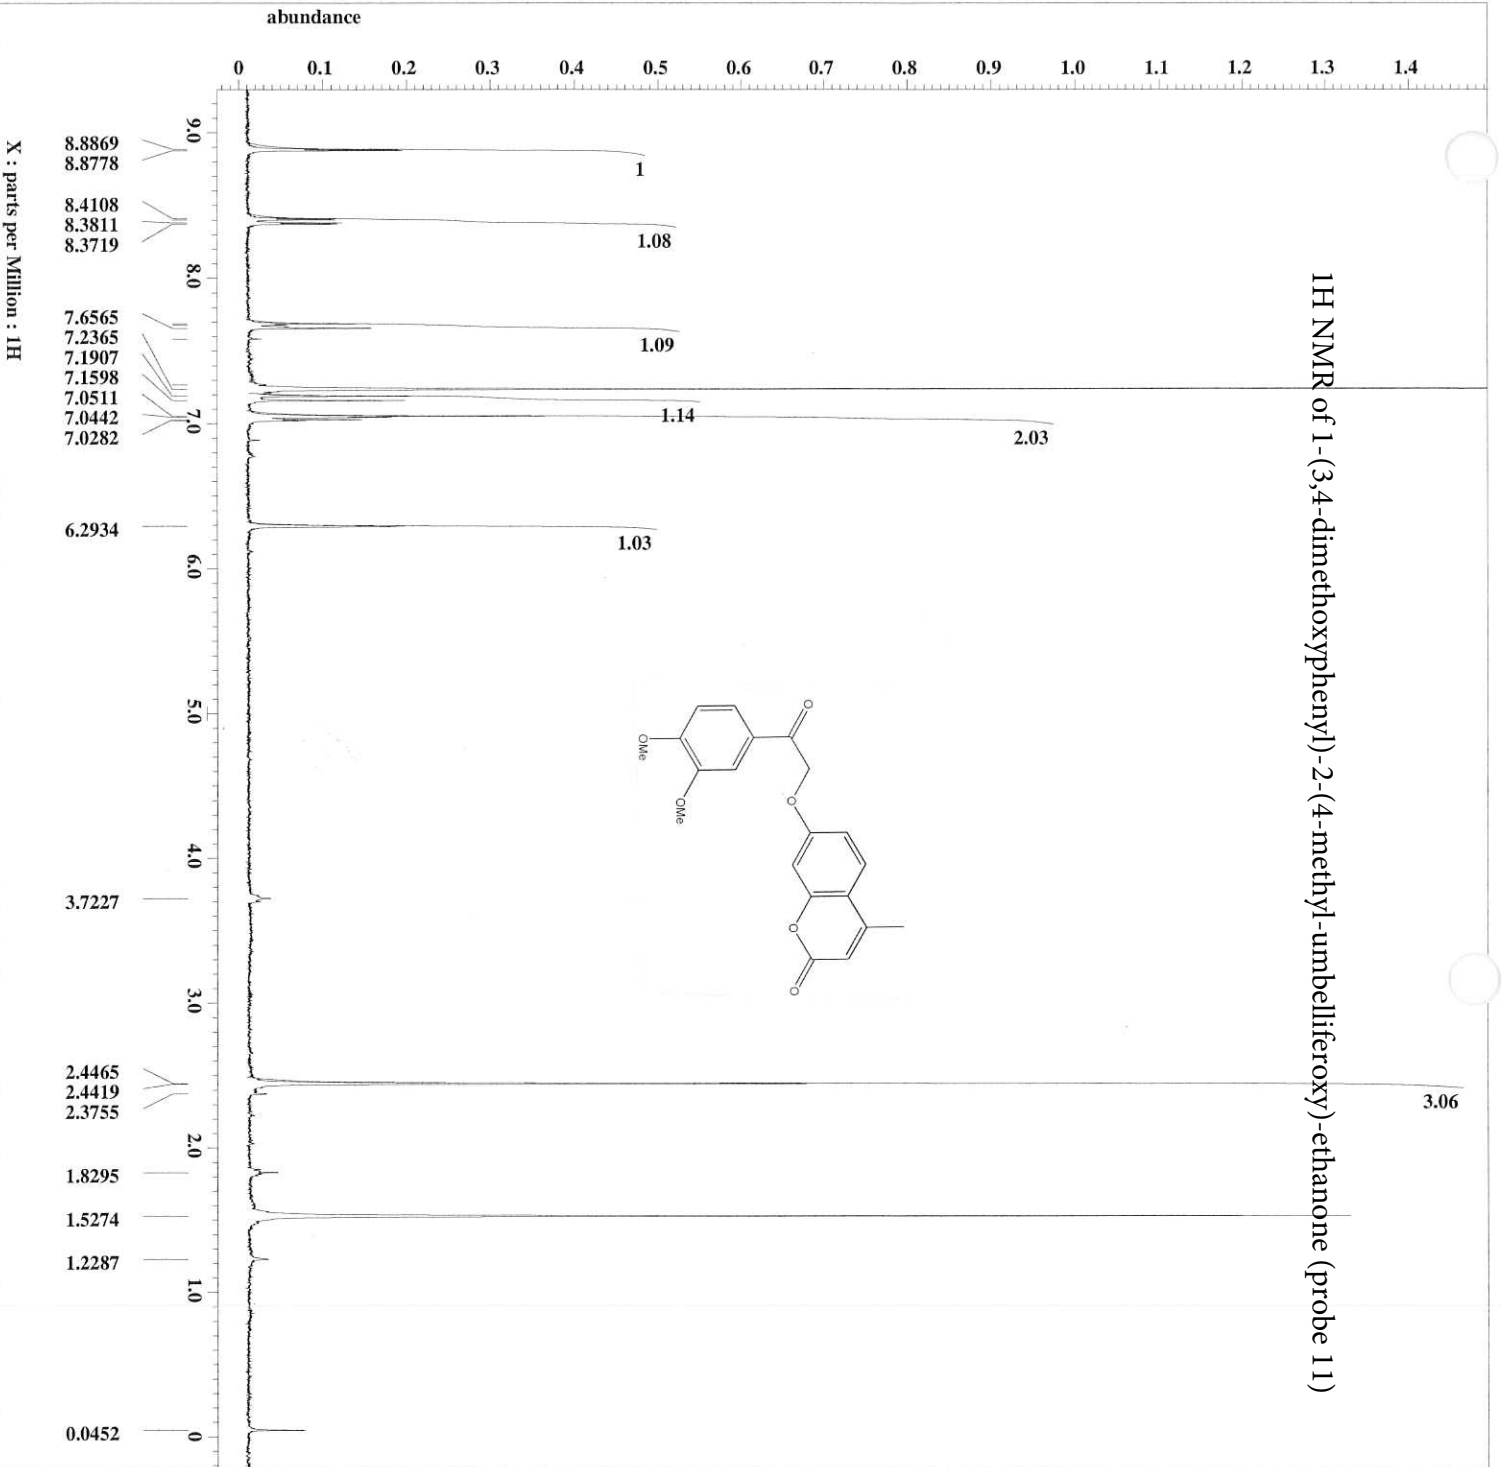

```

Filename = 102512QZ-IRI-206sing1
Author = qzhang
Experiment = single_pulse.ex2
Sample_id = 102512QZ-IRI-206sing1
Solvent = CHLOROFORM-D
Creation_time = 26-OCT-2012 15:05:24
Revision_time = 26-OCT-2012 14:59:48
Current_time = 26-OCT-2012 15:00:02

Comment = single_pulse
Data_format = 1D COMPLEX
Dim_size = 13107
Dim_title = 1H
Dim_units = [ppm]
Dimensions = X
Site = ECX 300
Spectrometer = ECX-300

Field_strength = 7.0586013[T] (300[MHz]
X_acq_duration = 2.90717696[ls]
X_domain = 1H
X_freq = 300.52965592[MHz]
X_offset = 5[ppm]
X_points = 16384
X_prescans = 1
X_resolution = 0.34397631[Hz]
X_sweep = 5.63570784[Hz]
Irr_domain = 1H
Irr_freq = 300.52965592[MHz]
Irr_offset = 5[ppm]
Tri_domain = 1H
Tri_freq = 300.52965592[MHz]
Tri_offset = 5[ppm]
Clipped = FALSE
Mod_return = 1
Scans = 8
Total_scans = 8

X_90_width = 13.43[us]
X_acq_time = 2.90717696[ls]
X_angle = 45[deg]
X_atn = 3[dB]
X_pulse = 6.715[us]
Irr_mode = Off
Tri_mode = Off
Dante_presat = FALSE
Initial_wait = 1[ls]
Recvr_gain = 50
Relaxation_delay = 5[ls]
Repetition_time = 7.90717696[ls]
Temp_get = 22.7[dc]
  
```

Standard <sup>13</sup>C  
Experiment

<sup>13</sup>C NMR of 1-(3,4-dimethoxyphenyl)-2-(4-methyl-umbelliferoyl)-ethanone (probe 11)

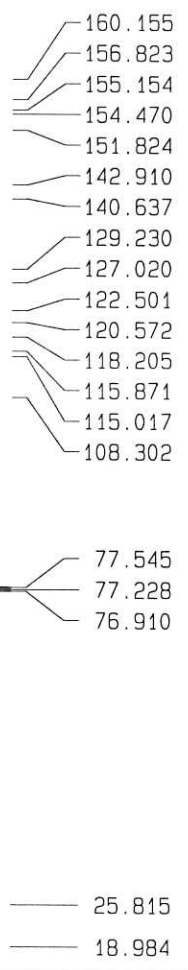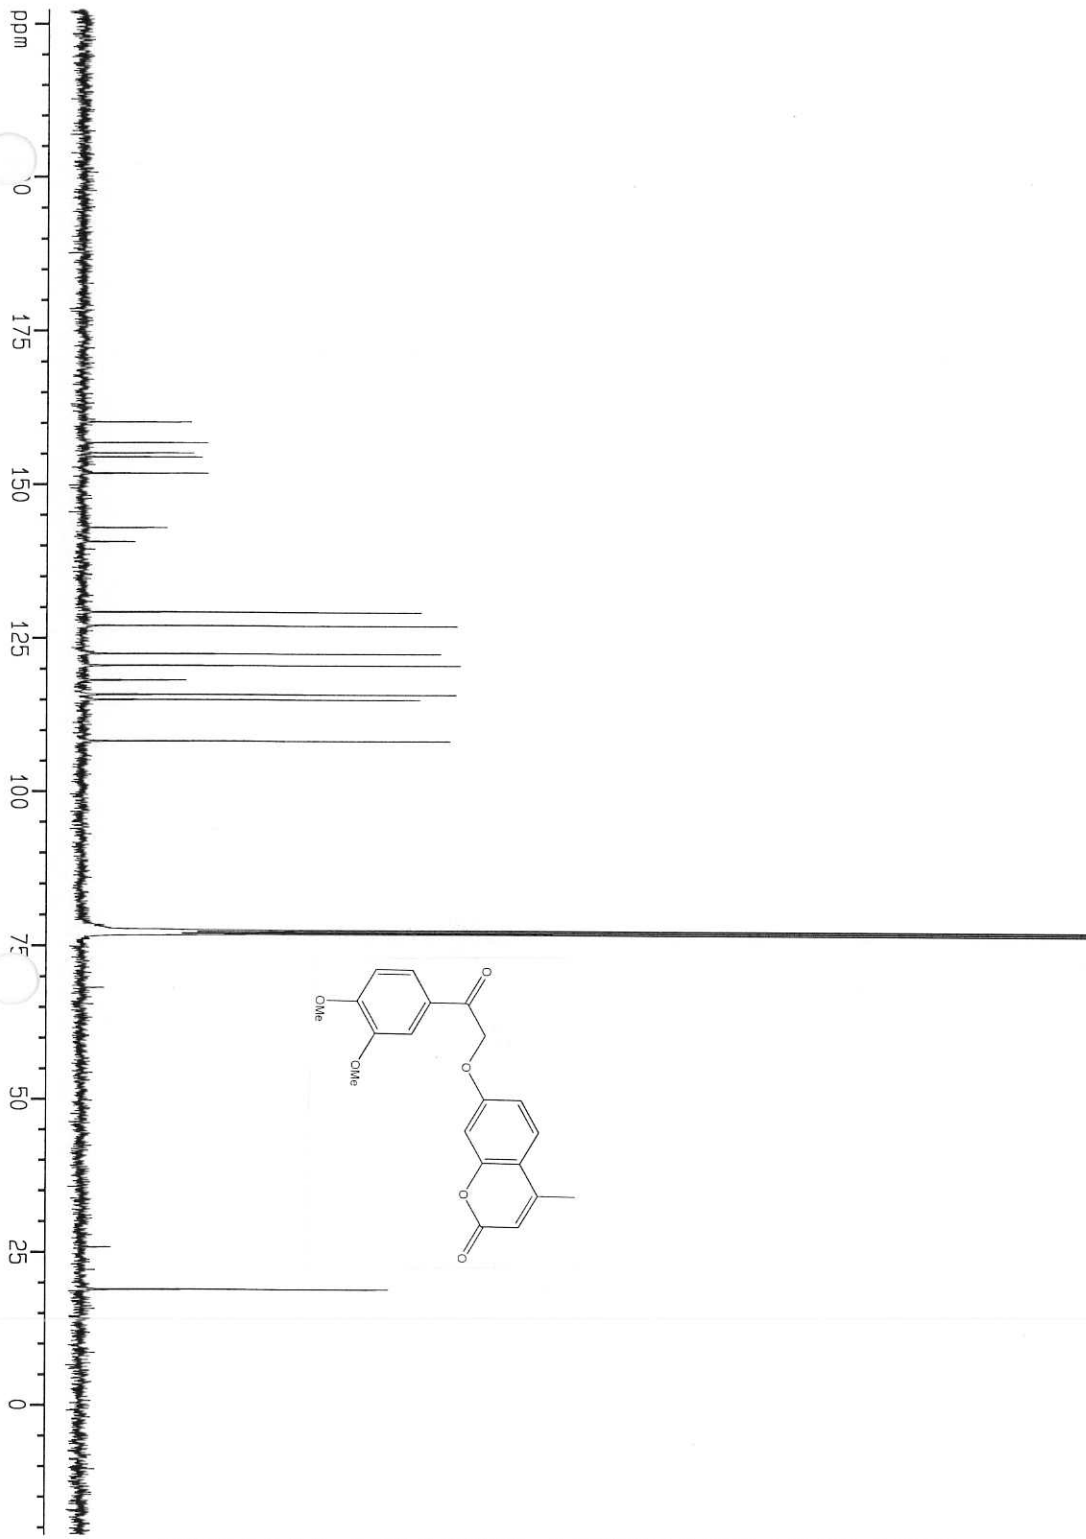

Current Data Parameters  
 NAME Q2-III-20611  
 EXPNO 9  
 PROCNO 1

F2 - Acquisition Parameters  
 Date\_ 500000  
 Time 11.12  
 INSTRUM arrx400  
 PROBNM 5 mm Multinuc1  
 PULPROG zgpgc30  
 TD 32768  
 SOLVENT DMS  
 NS 15239  
 DS 2  
 SWH 25000.000 Hz  
 FIDRES 0.762939 Hz  
 AQ 0.6554100 sec

RG 49500  
 DW 20.000 usec  
 DE 27.14 usec  
 TE 300.0 K  
 D12 0.00002000 sec  
 DL5 20.00 dB  
 CPDPRG walz16  
 P31 100.00 usec  
 D1 0.40000001 sec  
 P1 6.75 usec  
 DE 27.14 usec  
 SFO1 100.6231479 MHz  
 NUCLEUS 13C  
 D11 0.030000000 sec

F2 - Processing parameters  
 SI 16384  
 SF 100.6127490 MHz  
 MDW EM  
 SSB 0  
 LB 2.00 Hz  
 GB 0  
 PC 1.40

1D NMR plot parameters  
 CX 20.00 cm  
 F1P 227.296 ppm  
 F1 22868.89 Hz  
 F2P -21.181 ppm  
 F2 -2131.11 Hz  
 PPKCM 12.42387 ppm/cm  
 HZCM 1250.00012 Hz/cm

1H NMR of (6-Methoxy-2-naphthalenylmethyl)-β-D-glucopyranoside (probe 14)

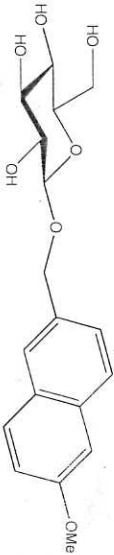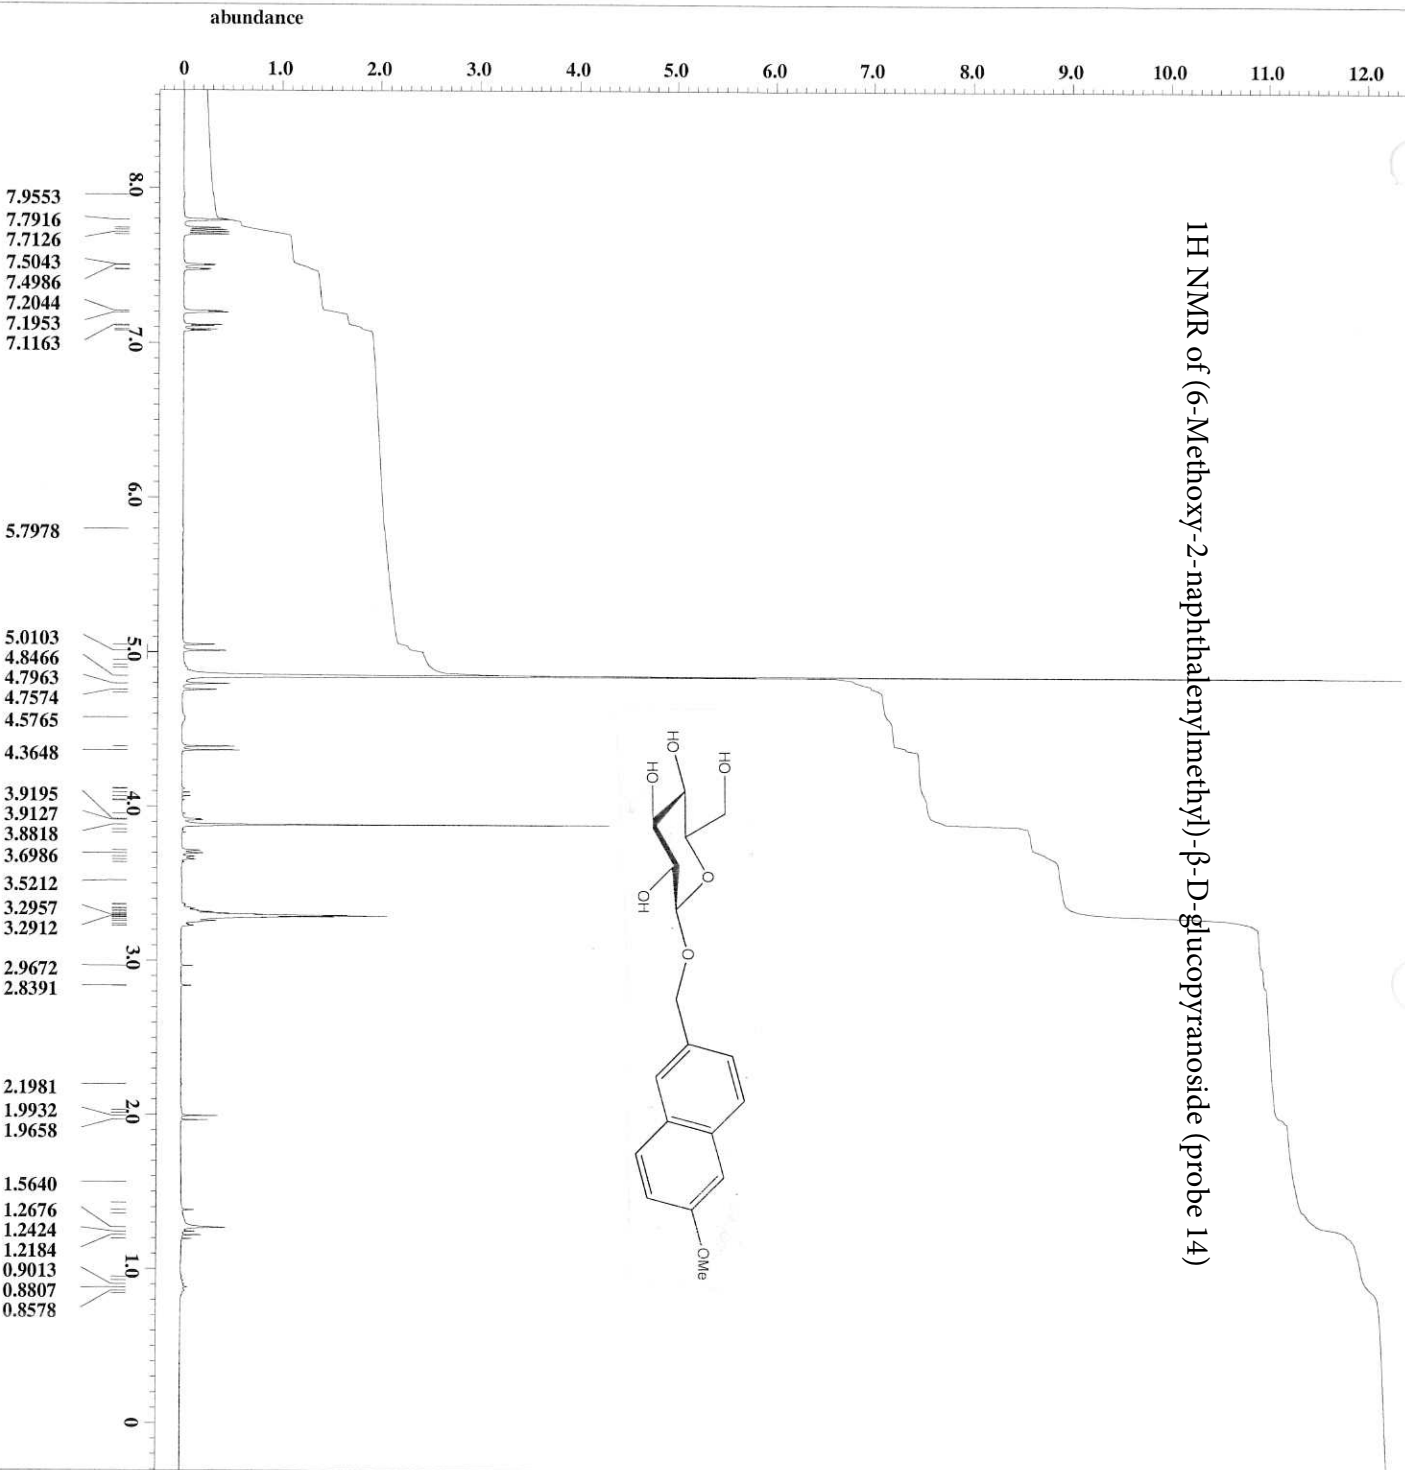

```

Filename = 051413QZ-IV-112single
Author = qzhang
Experiment = single_pulse.ex2
Sample id = 051413QZ-IV-112single
Solvent = METHANOL-D3
Creation time = 14-MAY-2013 09:36:26
Revision time = 14-MAY-2013 10:12:02
Current time = 14-MAY-2013 10:12:06

Comment = single_pulse
Data format = 1D COMPLEX
Dim size = 13107
Dim title = 1H
Dim units = [ppm]
Dimensions = X
Site = ECX 300
Spectrometer = ECX-300

Field_strength = 7.0586013[T] (300[MHz]
X_acq_duration = 2.90717696[ls]
X_domain = 1H
X_freq = 300.52965592[MHz]
X_offset = 5[ppm]
X_points = 16384
X_prescans = 1
X_resolution = 0.34397631[Hz]
X_sweep = 5.63570784[kHz]
Irr_domain = 1H
Irr_freq = 300.52965592[MHz]
Irr_offset = 5[ppm]
Irr_domain = 1H
Tri_freq = 300.52965592[MHz]
Tri_offset = 5[ppm]
Clipped = FALSE
Mod_return = 1
Scans = 8
Notal_scans = 8
X_90_width = 13.43[us]
X_acq_time = 2.90717696[ls]
X_angle = 45[deg]
X_atn = 3[dB]
X_pulse = 6.715[us]
Irr_mode = Off
Irr_mode = Off
Daute_presat = FALSE
Initial_wait = 1[ls]
Recvr_gain = 44
Relaxation_delay = 5[ls]
Repetition_time = 7.90717696[ls]
Temp_get = 23.8[degC]
  
```



<sup>13</sup>C NMR of (6-Methoxy-2-naphthalenylmethyl)-β-D-glucopyranoside (probe 14)

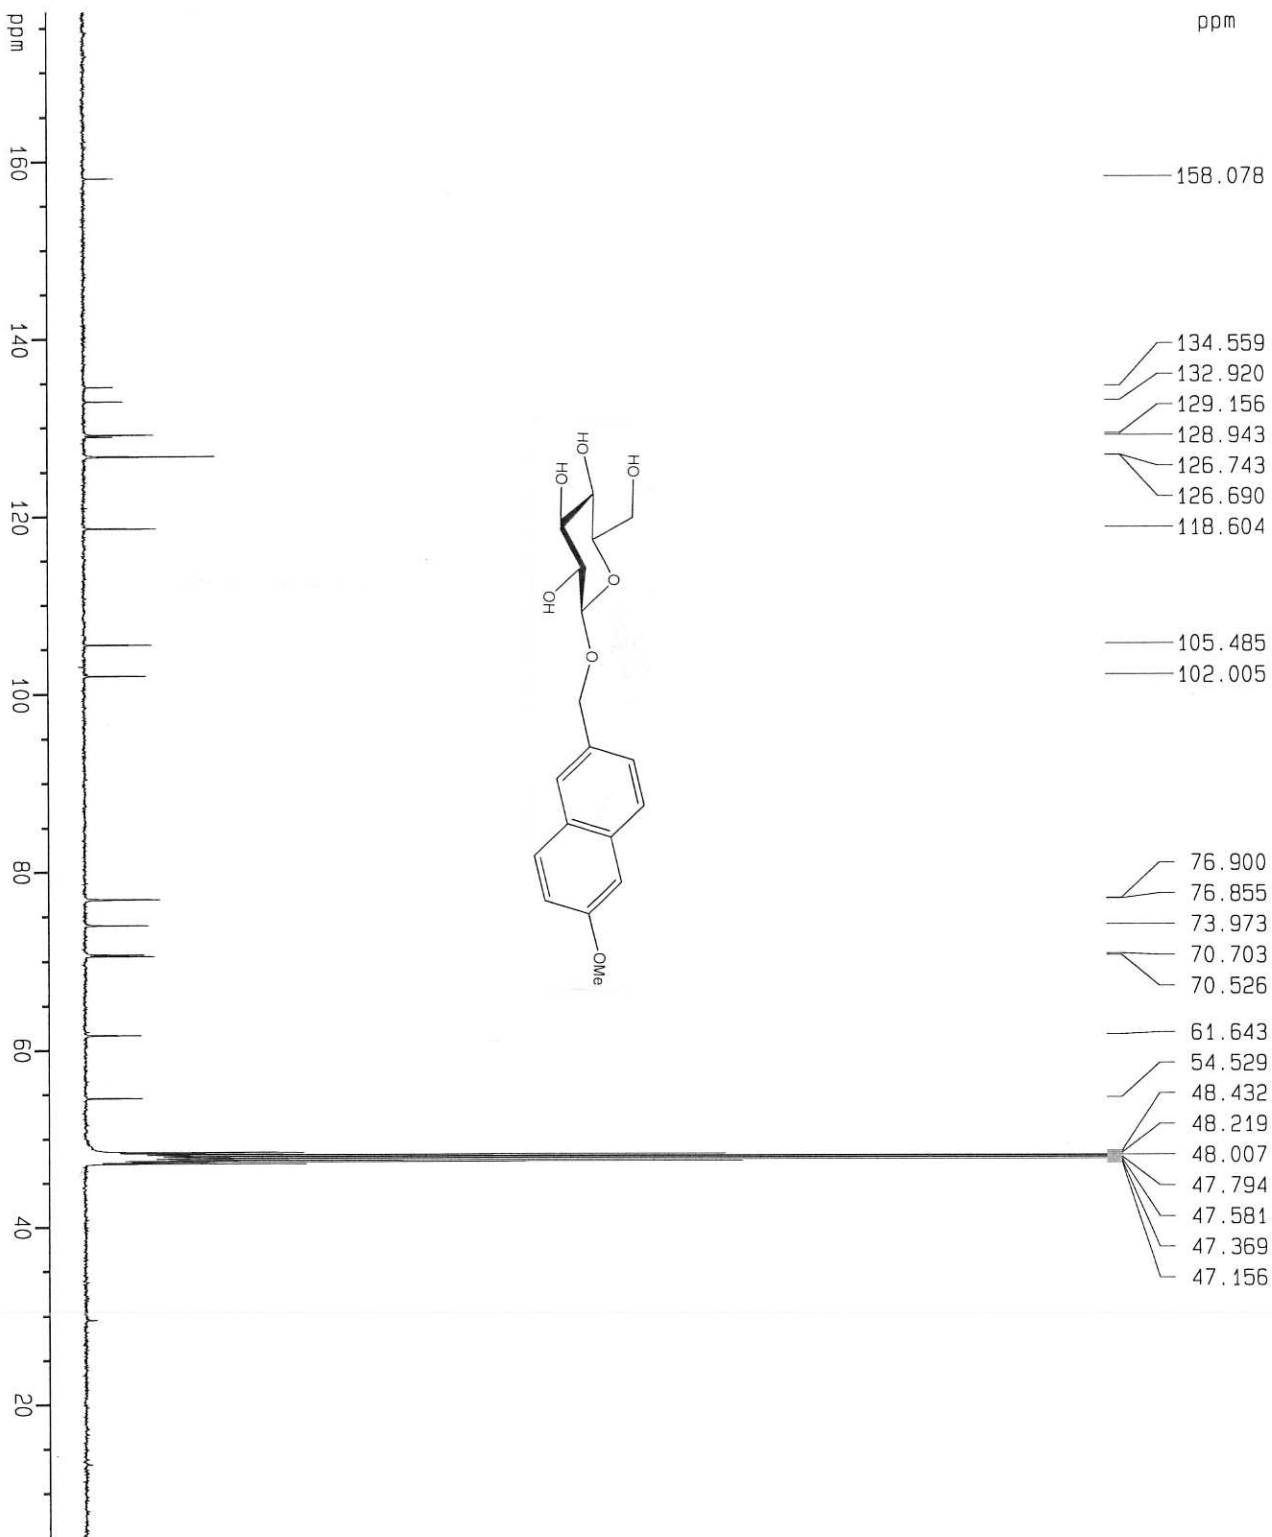

Current Data Parameters  
 NAME QZ-IV-112  
 EXPNO 9  
 PROCNO 1

F2 - Acquisition Parameters  
 Date\_ 500000  
 Time 10.58  
 INSTRUM arx400  
 PROBHD 5 mm Multinuc1  
 PULPROG zgpg30  
 TD 32768  
 SOLVENT MeOH  
 NS 10487  
 DS 2  
 SMH 25000.000 Hz  
 FIDRES 0.762939 Hz  
 AG 0.6554100 sec  
 RG 45500  
 DW 20.000 usec  
 DE 27.14 usec  
 TE 300.0 K  
 D12 0.00002000 sec  
 DL5 20.00 dB  
 CPDPRG8 waltz16  
 P31 100.00 usec  
 D1 0.40000001 sec  
 P1 6.75 usec  
 DE 27.14 usec  
 SF01 100.6231179 MHz  
 NUCLEUS 13C  
 D11 0.03000000 sec

F2 - Processing parameters  
 SI 16384  
 SF 100.6127490 MHz  
 MDW EM  
 SSB 0  
 LB 2.00 Hz  
 GB 0  
 PC 1.40

1D NMR plot parameters  
 CX 20.00 cm  
 F1P 176.793 ppm  
 F1 17787.59 Hz  
 F2P 5.081 ppm  
 F2 511.17 Hz  
 PPMCM 8.58560 ppm/cm  
 HZCM 863.82104 Hz/cm

## 1H NMR of (6-Methoxy-2-naphthalenylmethyl)-β-D-xylopyranoside (probe 16)

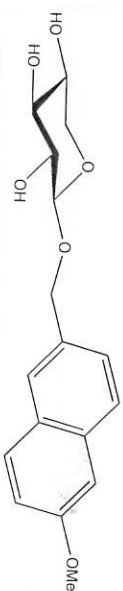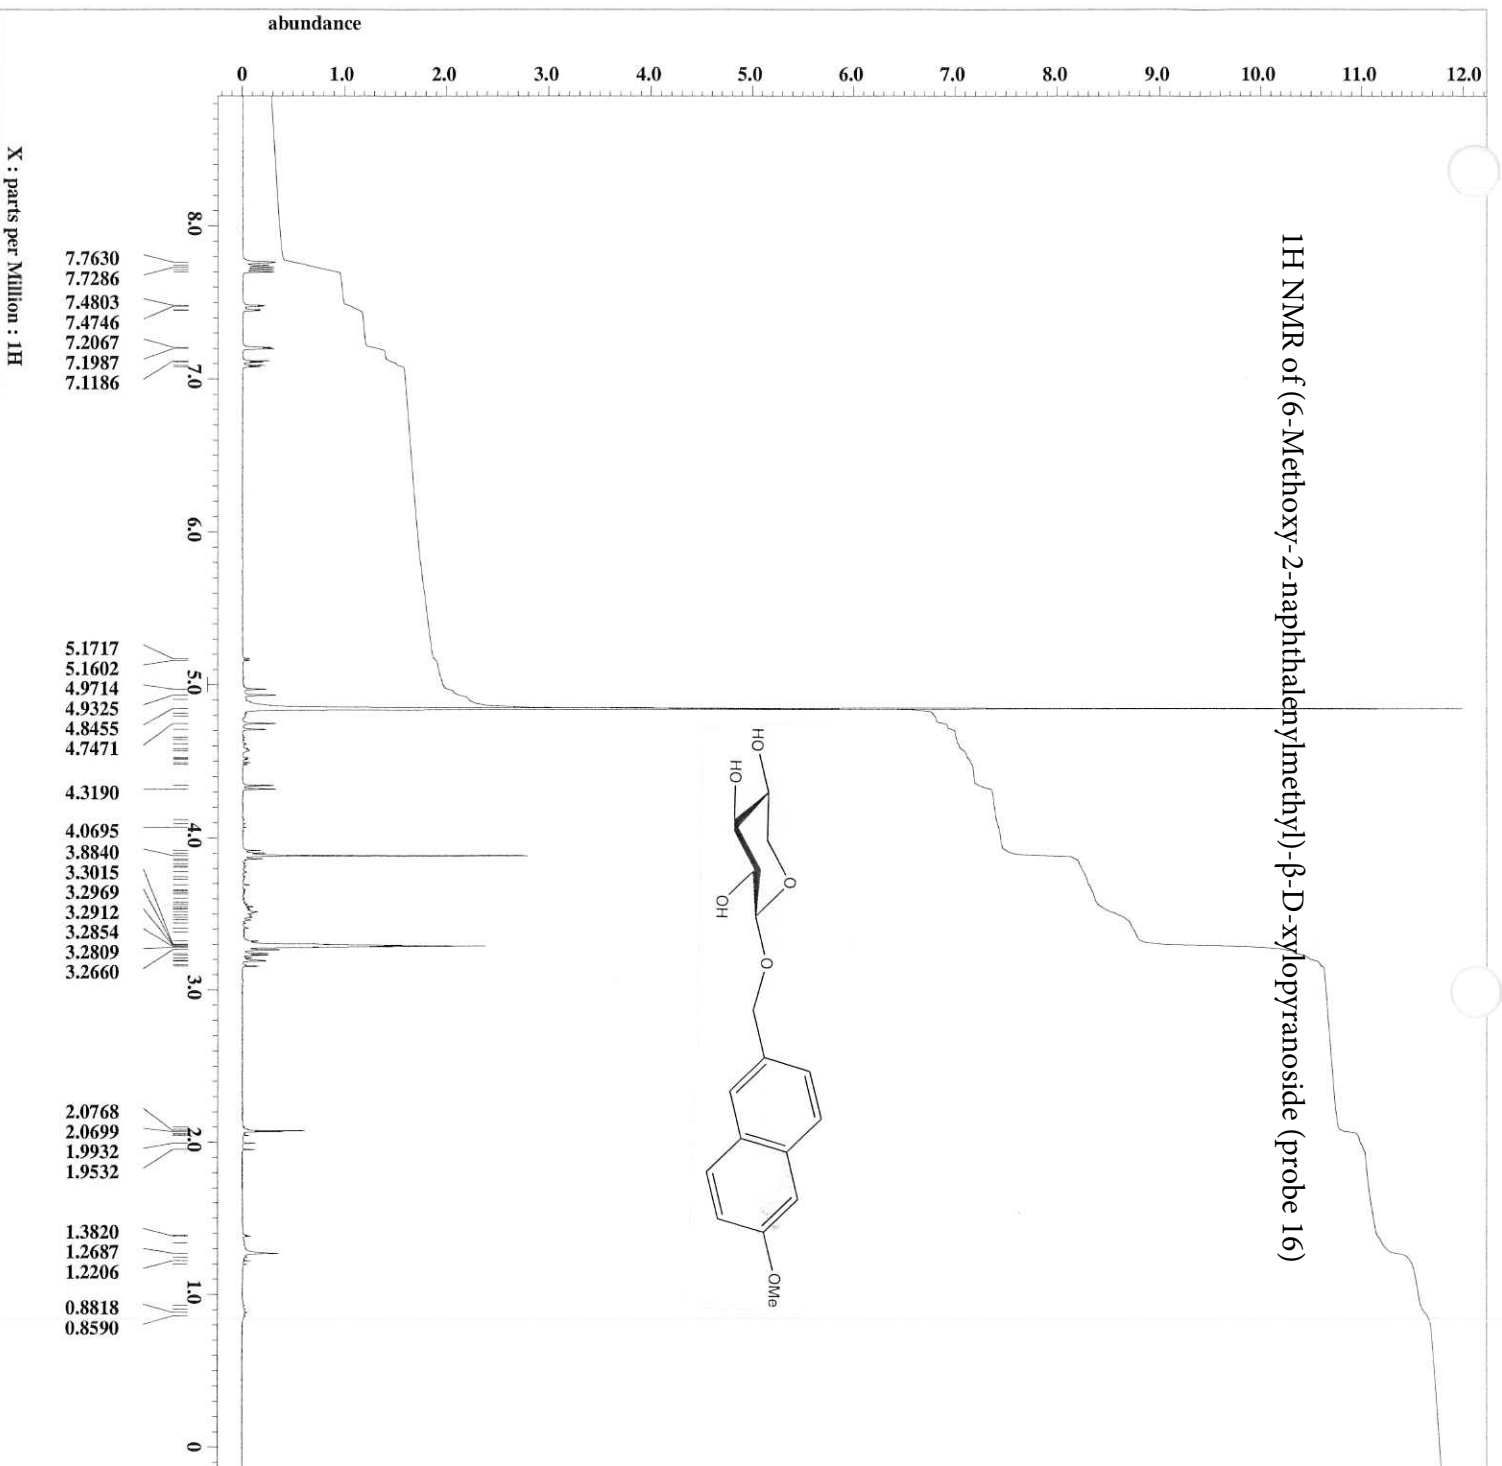

```

Filename = 050813QZ-TV-1051V51ng
Author = qzhang
Experiment = single_pulse.ex2
Sample_id = 050813QZ-TV-1051V51ng
Solvent = MECHANOL-D3
Creation_time = 8-MAY-2013 14:08:33
Revision_time = 8-MAY-2013 14:44:12
Current_time = 8-MAY-2013 14:44:16

Comment = single_pulse
Data_format = 1D COMPLEX
Dim_size = 13107
Dim_title = 1H
Dim_units = [ppm]
Dimensions = X
Site = ECK 300
Spectrometer = ECK-300

Field_strength = 7.0586013 [T] (300 [MHz]
X_acq_duration = 2.90717696 [s]
X_domain = 1H
X_freq = 300.52965592 [MHz]
X_offset = 5 [ppm]
X_points = 16384
X_prescans = 1
X_resolution = 0.34397631 [Hz]
X_sweep = 5.63570784 [kHz]
Irr_domain = 1H
Irr_freq = 300.52965592 [MHz]
Irr_offset = 5 [ppm]
Irr_domain = 1H
Irr_freq = 300.52965592 [MHz]
Irr_offset = 5 [ppm]
Mod_return = FALSE
Mod_return = 1
Total_scans = 8
X_90_width = 13.43 [us]
X_acq_time = 2.90717696 [s]
X_angle = 45 [deg]
X_atn = 3 [dB]
X_pulse = 6.715 [us]
Irr_mode = Off
Irr_mode = Off
Daute_presat = FALSE
Initial_wait = 1 [s]
Recvr_gain = 46
Relaxation_delay = 5 [s]
Repetition_time = 7.90717696 [s]
Temp_get = 23.8 [dC]
  
```

**<sup>13</sup>C NMR of (6-Methoxy-2-naphthalenylmethyl)-β-D-xylopyranoside (probe 16)**

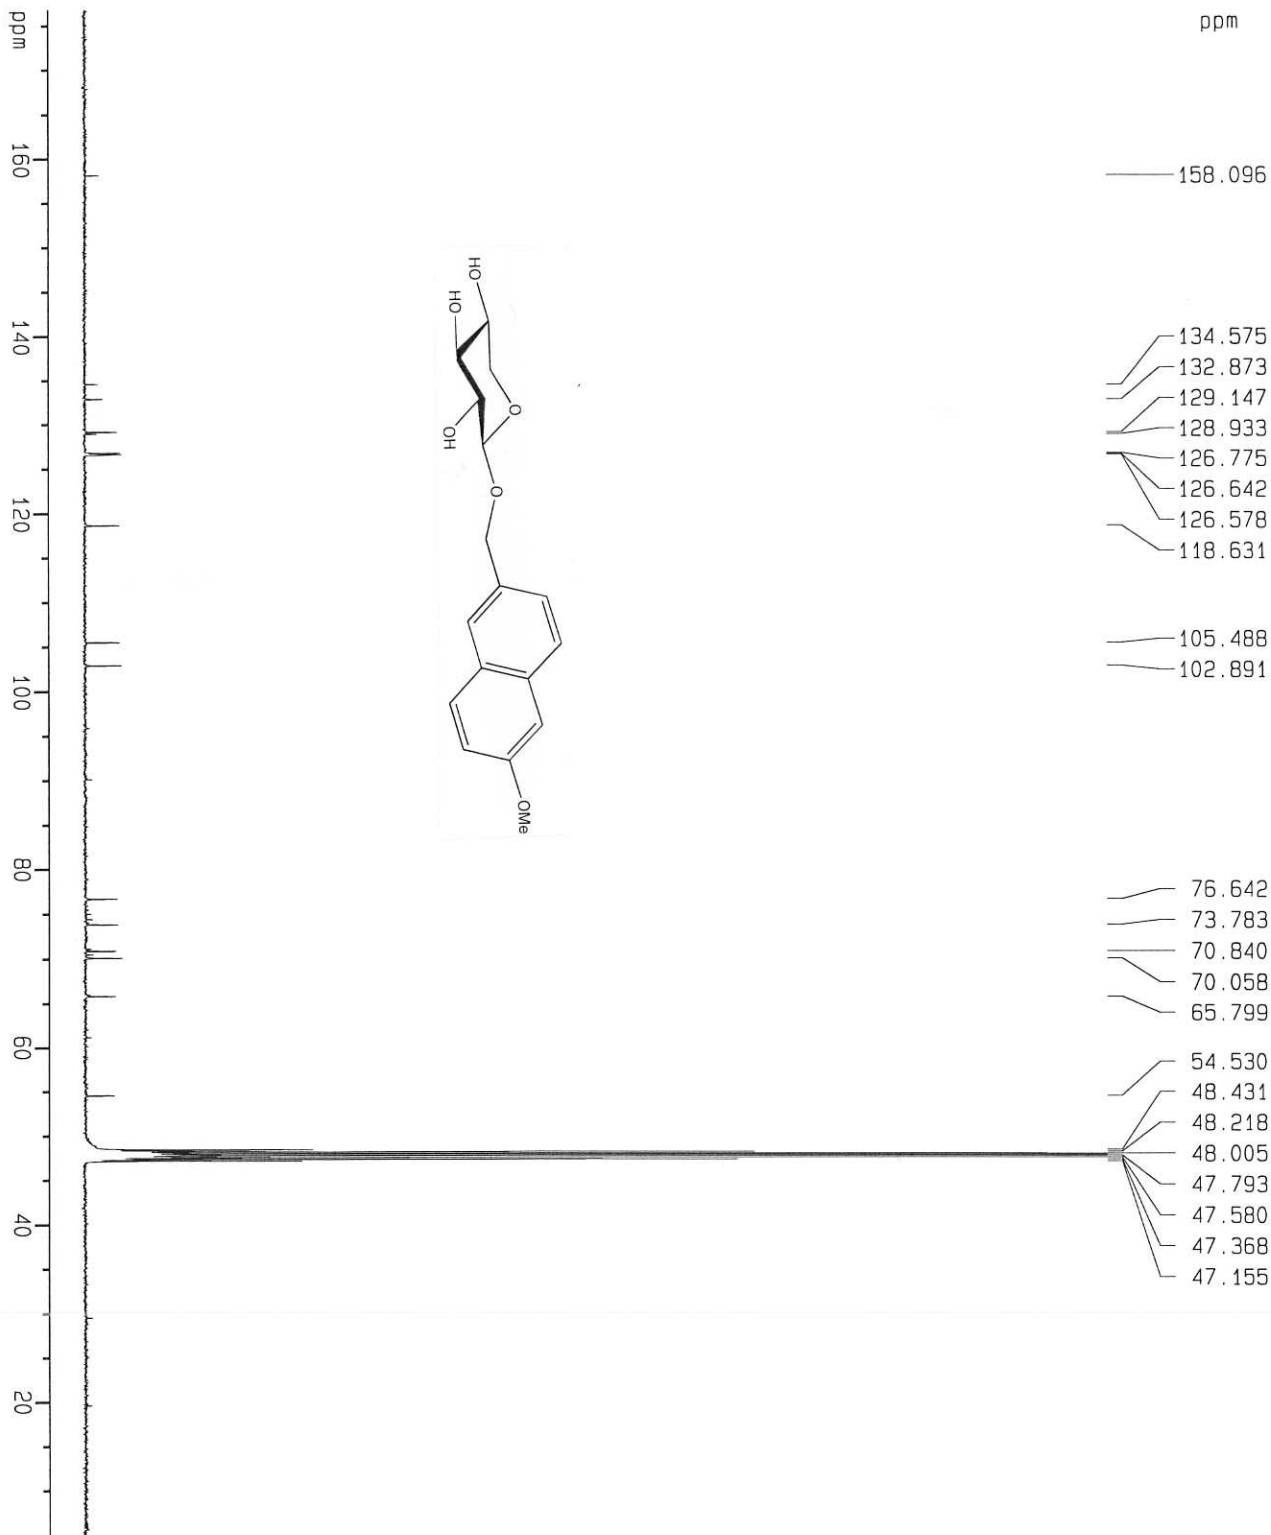

Current Data Parameters  
 NAME QZ-IV-1051V  
 EXPNO 9  
 PROCNO 1

F2 - Acquisition Parameters  
 Date\_ 500000  
 Time 10.29  
 INSTRUM srx400  
 PROBHD 5 mm Multinuc1  
 PULPROG zgpg30  
 TD 32758  
 SOLVENT MeOH  
 NS 12330  
 DS 2  
 SMH 25000.000 Hz  
 FIDRES 0.762939 Hz  
 AQ 0.6554100 sec  
 RG 45500  
 DW 20.000 usec  
 DE 27.14 usec  
 TE 300.0 K  
 D12 0.00002000 sec  
 DLS 20.00 dB  
 CPDPRG waltz16  
 P31 100.00 usec  
 D1 0.40000001 sec  
 P1 6.75 usec  
 DE 27.14 usec  
 SF01 100.6231179 MHz  
 NUCLEUS <sup>13</sup>C  
 D11 0.03000000 sec

F2 - Processing parameters  
 SI 16384  
 SF 100.6127490 MHz  
 MDW EM  
 SSB 0  
 LB 2.00 Hz  
 GB 0  
 PC 1.40

1D NMR plot parameters  
 CX 20.00 cm  
 F1P 176.793 ppm  
 F1 17787.59 Hz  
 F2P 5.081 ppm  
 F2 511.17 Hz  
 PPMCM B:58560 ppp/cm  
 HZCM B63.82104 Hz/cm

1H NMR of (6-Methoxy-2-naphthalenylmethyl)-β-D-cellobioside (probe 17)

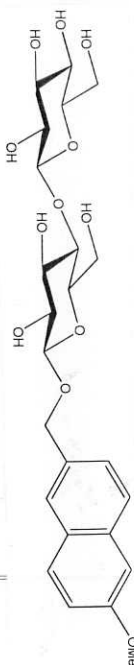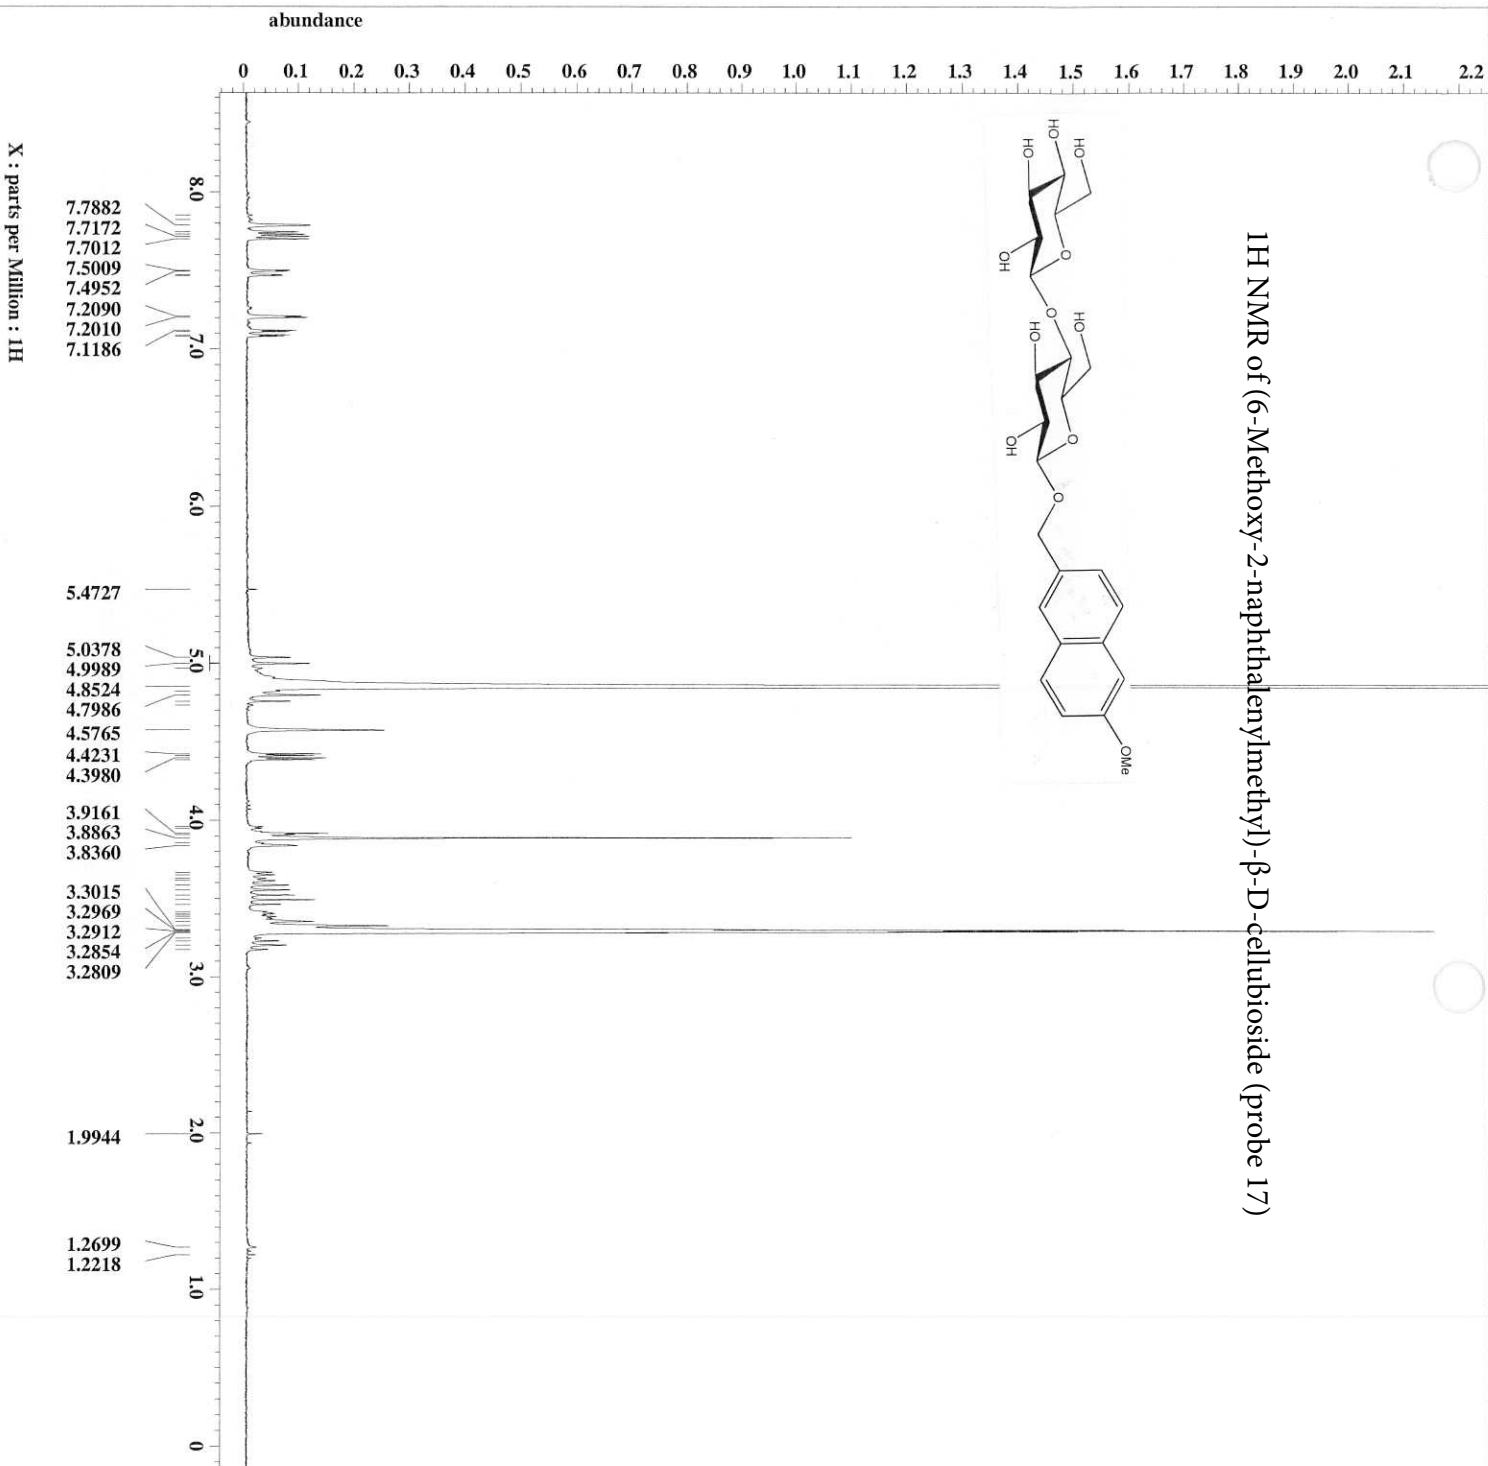

```

Filename = 052413QZ-1V-119single
Author = qzhang
Experiment = single_pulse.ex2
Sample_id = 052413QZ-1V-119single
Solvent = METHANOL-D3
Creation_time = 24-MAY-2013 10:37:34
Revision_time = 24-MAY-2013 11:11:13
Current_time = 24-MAY-2013 11:11:28

Comment = single_pulse
Data_format = 1D COMPLEX
Dim_size = 13107
Dim_title = 1H
Dim_units = [ppm]
Dimensions = X 300
Site = ECKX-300
Spectrometer = ECKX-300

Field_strength = 7.0586013[Hz] (300[MHz]
X_acq_duration = 2.90717696[ls]
X_domain = 1H
X_freq = 300.52965592[MHz]
X_offset = 51[ppm]
X_points = 16384
X_prescans = 1
X_resolution = 0.34397631[Hz]
X_sweep = 5.63570784[kHz]
Irr_domain = 1H
Irr_freq = 300.52965592[MHz]
Irr_offset = 51[ppm]
Irr_domain = 1H
Tri_freq = 300.52965592[MHz]
Tri_offset = 51[ppm]
Clipped = FALSE
Mod_return = 1
Scans = 8
Total_scans = 8

X_90_width = 13.43[us]
X_acq_time = 2.90717696[ls]
X_angle = 451[deg]
X_atn = 31[db]
X_pulse = 6.715[us]
Irr_mode = OFF
Tri_mode = OFF
Dante_preset = FALSE
Trnitial_wait = 1[ls]
Recvr_gain = 46
Relaxation_delay = 5[ls]
Repetition_time = 7.90717696[ls]
Temp_get = 23.3[degC]
  
```

Standard JC  
Experiment

13C NMR of (6-Methoxy-2-naphthalenyl)methyl)-β-D-cellubioside (probe 17)

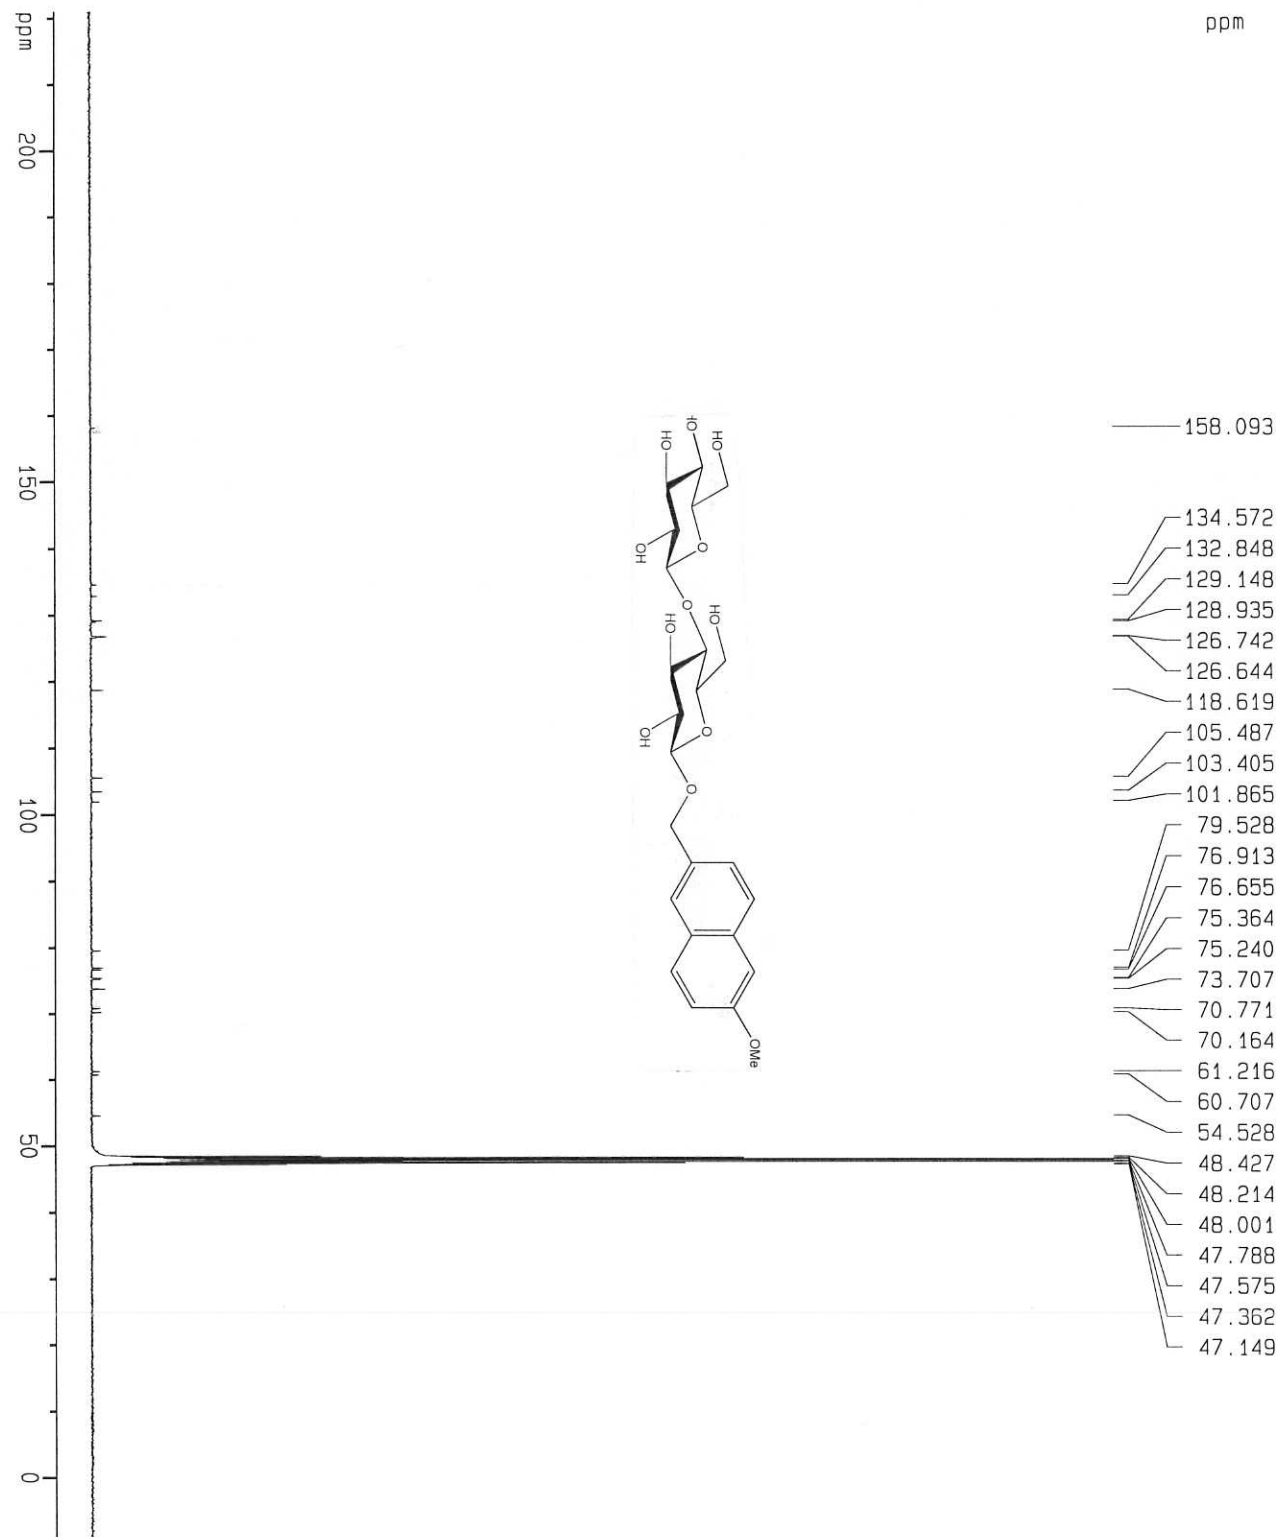

Current Data Parameters

NAME QZ-IV-119

EXPNO 9

PROCNO 1

F2 - Acquisition Parameters

Date\_ 500000

Time 11.37

INSTRUM brx400

PROBHD 5 mm Multinuc1

PULPROG zgpg30

TD 32768

SOLVENT MeOH

NS 39540

DS 2

SMH 25000.000 Hz

FTIDRES 0.762939 Hz

AQ 0.6554100 sec

RG 45500

DW 20.000 usec

DE 27.14 usec

TE 300.0 K

D12 0.00002000 sec

DL5 20.00 dB

CPDPRG waltz16

P31 100.00 usec

D1 0.40000001 sec

P1 6.75 usec

DE 27.14 usec

SFO1 100.6231179 MHz

NUCLEUS 13C

D11 0.03000000 sec

F2 - Processing parameters

SF 15384

SF 100.6127490 MHz

MDM EK

SSB 0

LB 2.00 Hz

GB 0

PC 1.40

1D NMR plot parameters

CX 20.00 cm

F1P 221.028 ppm

F1 22238.22 Hz

F2P -8.895 ppm

F2 -894.98 Hz

PPMCM 11.49516 ppm/cm

HZCM 1156.65991 Hz/cm

1H NMR of (6-Methoxy-2-naphthalenylmethyl)-2,3,4,6-tetra-O-acetyl-β-D-glucopyranoside (8)

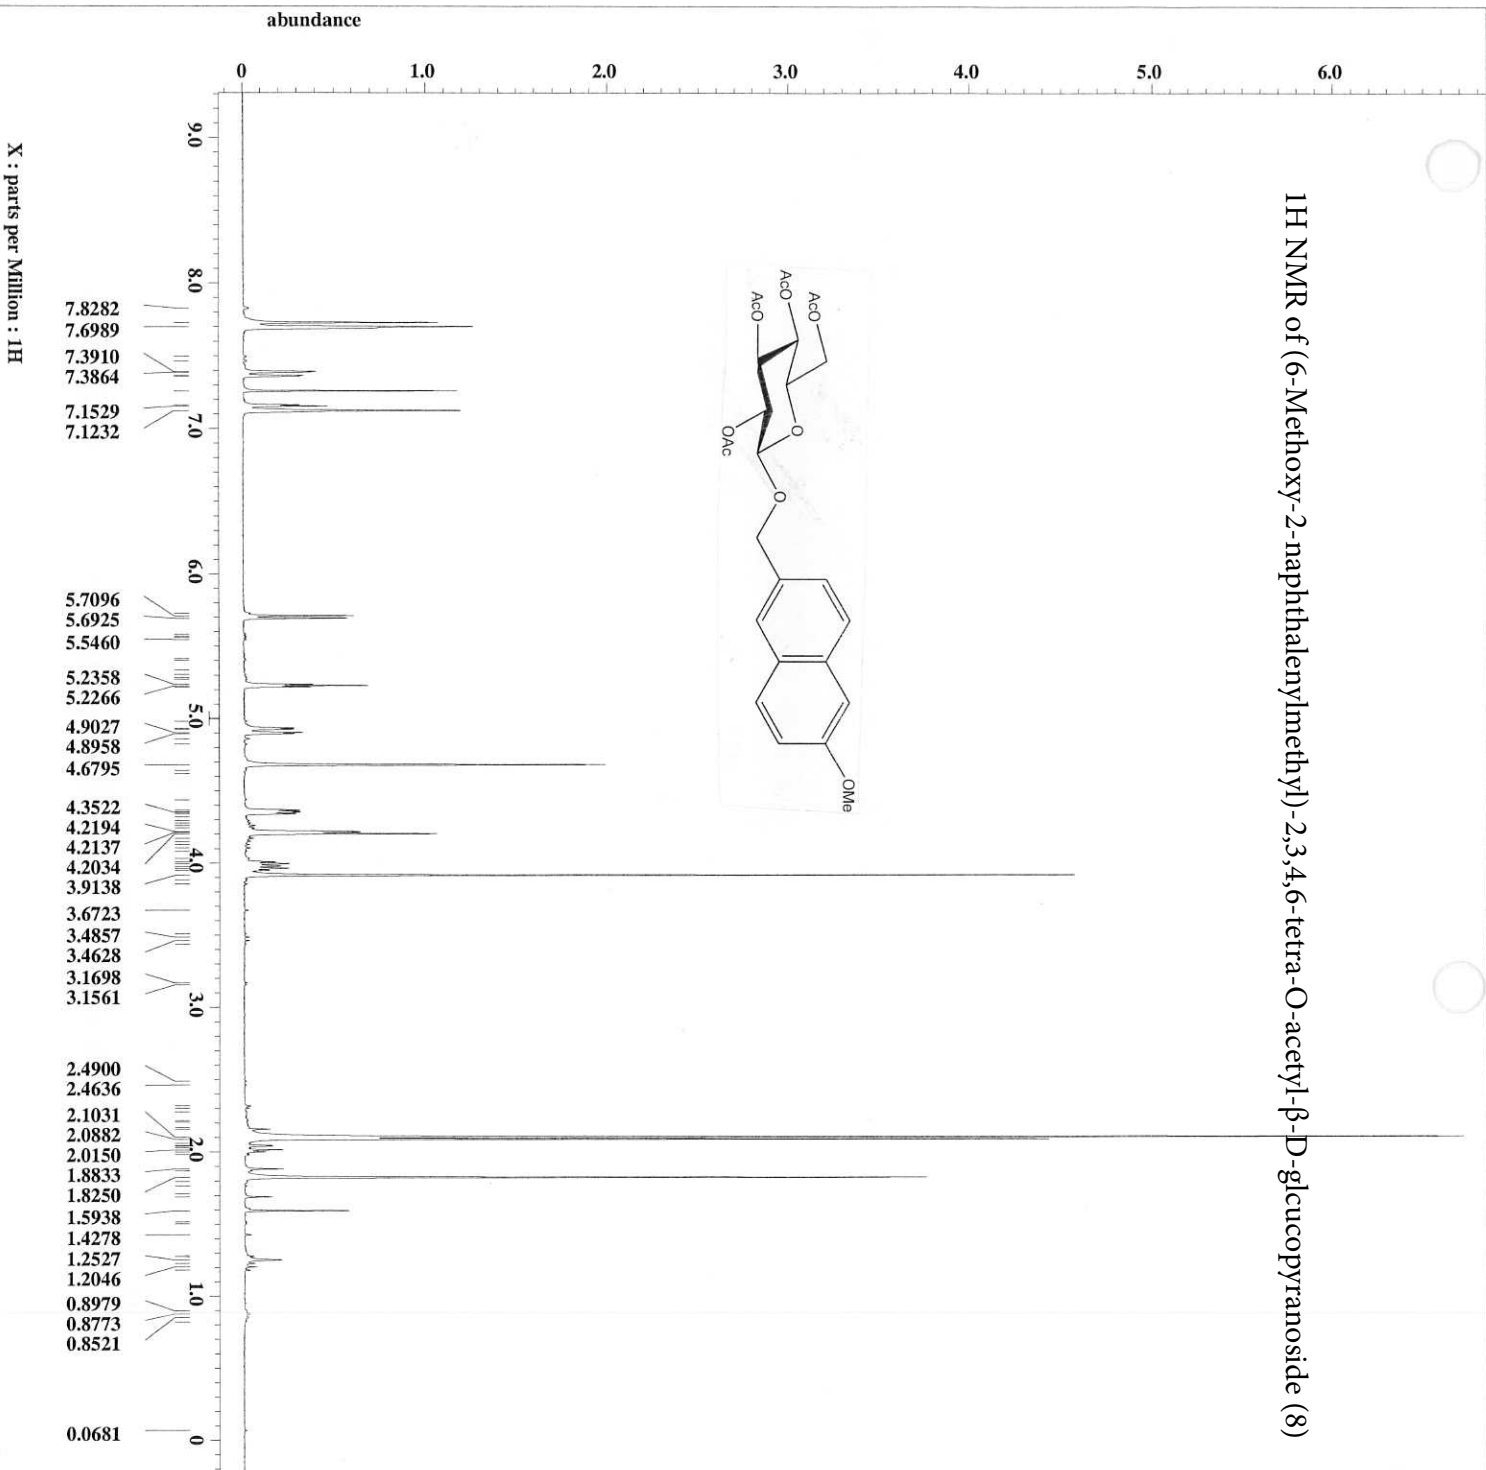

```

Filename = 030713QZ-IV-50single-
Author = qzang
Experiment = single_pulse.ex2
Sample_id = 030713QZ-IV-50single-
Solvent = CHLOROFORM-D
Creation_time = 7-MAR-2013 09:47:48
Revision_time = 7-MAR-2013 10:12:07
Current_time = 7-MAR-2013 10:12:47

Comment = single_pulse
Data_format = 1D COMPLEX
Dim_size = 13107
Dim_title = 1H
Dim_units = [ppm]
Dimensions = X
Site = ECX 300
Spectrometer = ECX-300

Field_strength = 7.0586013[T] (300[MHz]
X_acq_duration = 2.90717696[fs]
X_domain = 1H
X_freq = 300.52965592[MHz]
X_offset = 5[ppm]
X_points = 16384
X_prescans = 1
X_resolution = 0.34397631[Hz]
X_sweep = 5.63570784[kHz]
Irr_domain = 1H
Irr_freq = 300.52965592[MHz]
Irr_offset = 5[ppm]
Irr_domain = 1H
Tri_freq = 300.52965592[MHz]
Tri_offset = 5[ppm]
Clipped = FALSE
Mod_return = 1
Scans = 8
Total_scans = 8

X_90_width = 13.43[us]
X_acq_time = 2.90717696[fs]
X_angle = 45[deg]
X_atn = 3[dB]
X_pulse = 6.715[us]
Irr_mode = Off
Tri_mode = Off
Dante_preset = FALSE
Initial_wait = 1[fs]
Recv_gain = 44
Relaxation_delay = 5[fs]
Repetition_time = 7.90717696[fs]
Temp_get = 22.2[dc]

```

13C NMR of (6-Methoxy-2-naphthalenylmethyl)-2,3,4,6-tetra-O-acetyl-β-D-glucopyranoside (8)

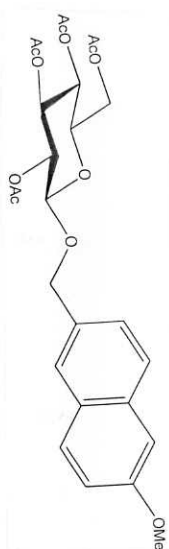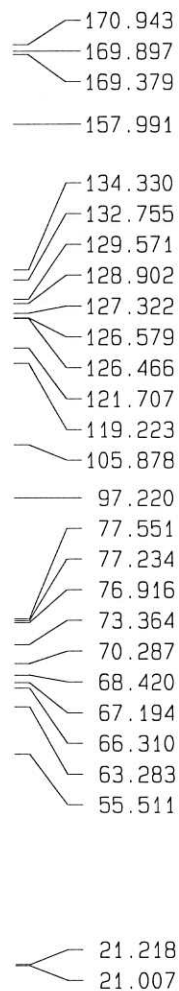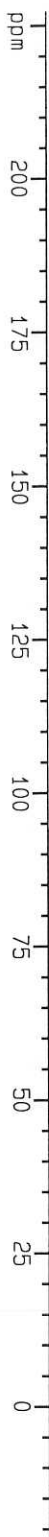

```

Current Data Parameters
NAME      QZ-IV-50
EXPNO    9
PROCNO   1

F2 - Acquisition Parameters
Date_    500000
Time     11.17
INSTRUM  brx400
PROBHD   5 mm Multinuc1
PULPROG  zgpgc30
TD        32768
SOLVENT  CDCl3
NS        2148
DS        2
SWH       25000.000 Hz
FIDRES    0.762939 Hz
AQ         0.6554100 sec
RG         45500
DM         20.000 usec
DE         27.14 usec
TE         300.0 K
D12        0.00002000 sec
DL5        20.00 dB
CPDPRG6   waltz16
P31        100.00 usec
D1         0.40000001 sec
P1         6.75 usec
DE         27.14 usec
SFO1      100.6231179 MHz
NUCLEUS   13C
D11        0.03000000 sec

F2 - Processing parameters
S1         15384
SF         100.6127490 MHz
WDW        EM
SSB        0
LB         2.00 Hz
GB         0
PC         1.40

1D NMR Plot parameters
CX         20.00 cm
F1P        227.296 ppm
F1         22868.89 Hz
F2P        -21.181 ppm
F2         -2131.11 Hz
PPMCM      12.42387 DDM/cm
HZCM       1250.00012 Hz/cm
    
```

1H NMR of (6-Methoxy-2-naphthalenylmethyl)-2,3,4-tri-O-acetyl-D-xylopyranoside (10)

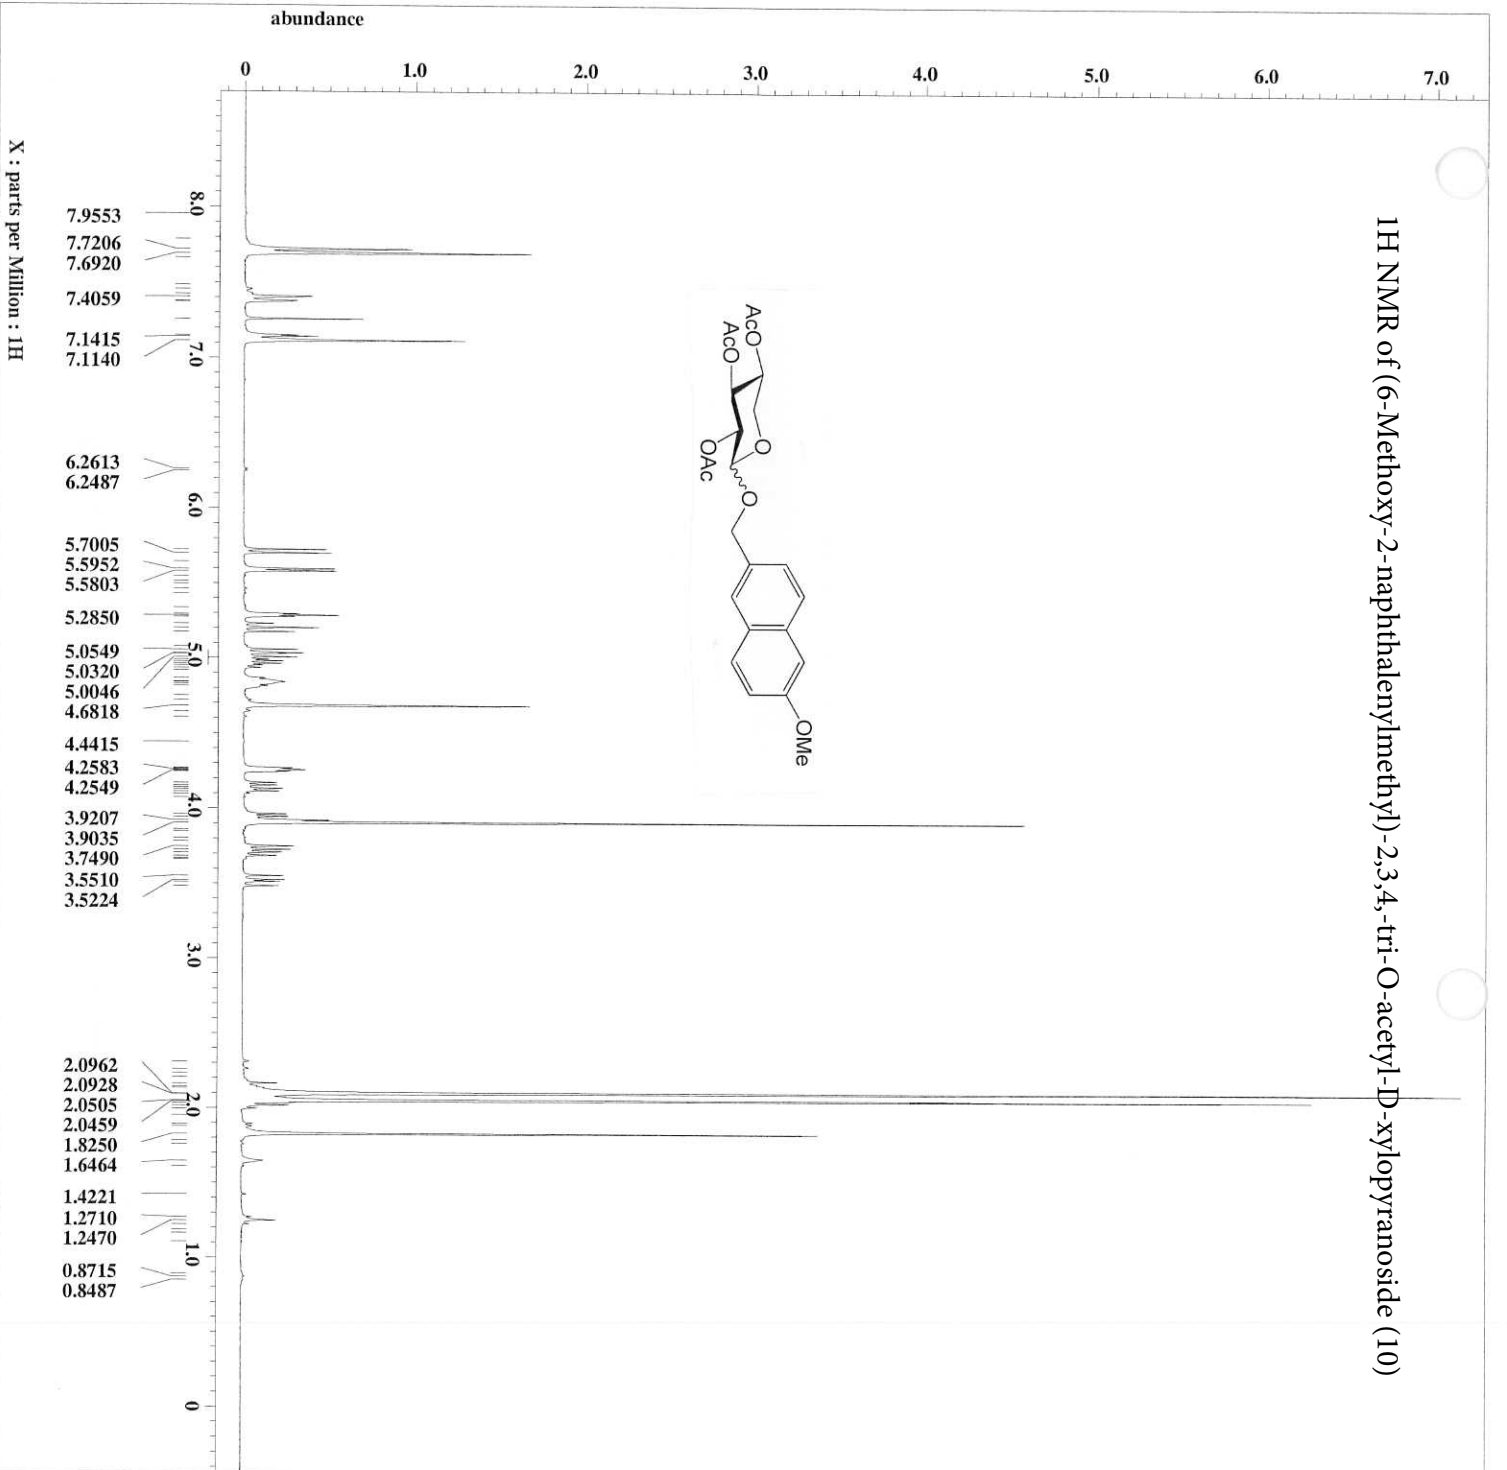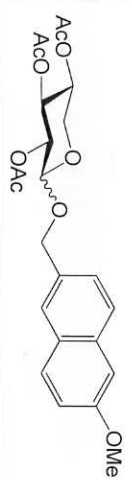

```

Filename = 0530130Z-IV-116single
Author = qzhang
Experiment = single_pulse.ex2
Sample_id = 0530130Z-IV-116single
Solvent = CHLOROFORM-D
Creation_time = 30-MAY-2013 14:36:47
Revision_time = 30-MAY-2013 20:35:50
Current_time = 30-MAY-2013 20:35:58

Comment = single pulse
Data_format = 1D COMPLEX
Dim_size = 13107
Dim_title = 1H
Dim_units = [ppm]
Dimensions = X
Site = ECKX-300
Spectrometer = ECKX-300

Field_strength = 7.0586013 [T] (300 [MHz]
X_acq_duration = 2.90717696 [s]
X_domain = 1H
X_freq = 300.52965592 [MHz]
X_offset = 5 [ppm]
X_points = 16384
X_prescans = 1
X_resolution = 0.34397631 [Hz]
X_sweep = 5.63570784 [kHz]
Irr_domain = 1H
Irr_freq = 300.52965592 [MHz]
Irr_offset = 5 [ppm]
Irr_domain = 1H
Tri_freq = 300.52965592 [MHz]
Tri_offset = 5 [ppm]
Clipped = FALSE
Mod_return = 1
Scans = 8
Total_scans = 8
X_90_width = 13.43 [us]
X_acq_time = 2.90717696 [s]
X_angle = 45 [deg]
X_atn = 3 [dB]
X_pulse = 6.715 [us]
Irr_mode = Off
Tri_mode = Off
Dante_presat = FALSE
Initial_wait = 1 [s]
Recvr_gain = 40
Relaxation_delay = 7.90717696 [s]
Repetition_time = 23.5 [dcl]
Temp_get =
    
```

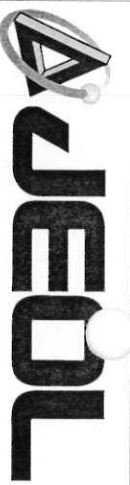



<sup>13</sup>C NMR of (6-Methoxy-2-naphthalenylmethyl)-2,3,4-tri-O-acetyl-D-xylopyranoside (10)

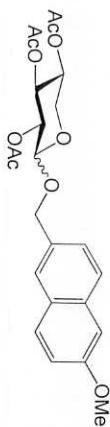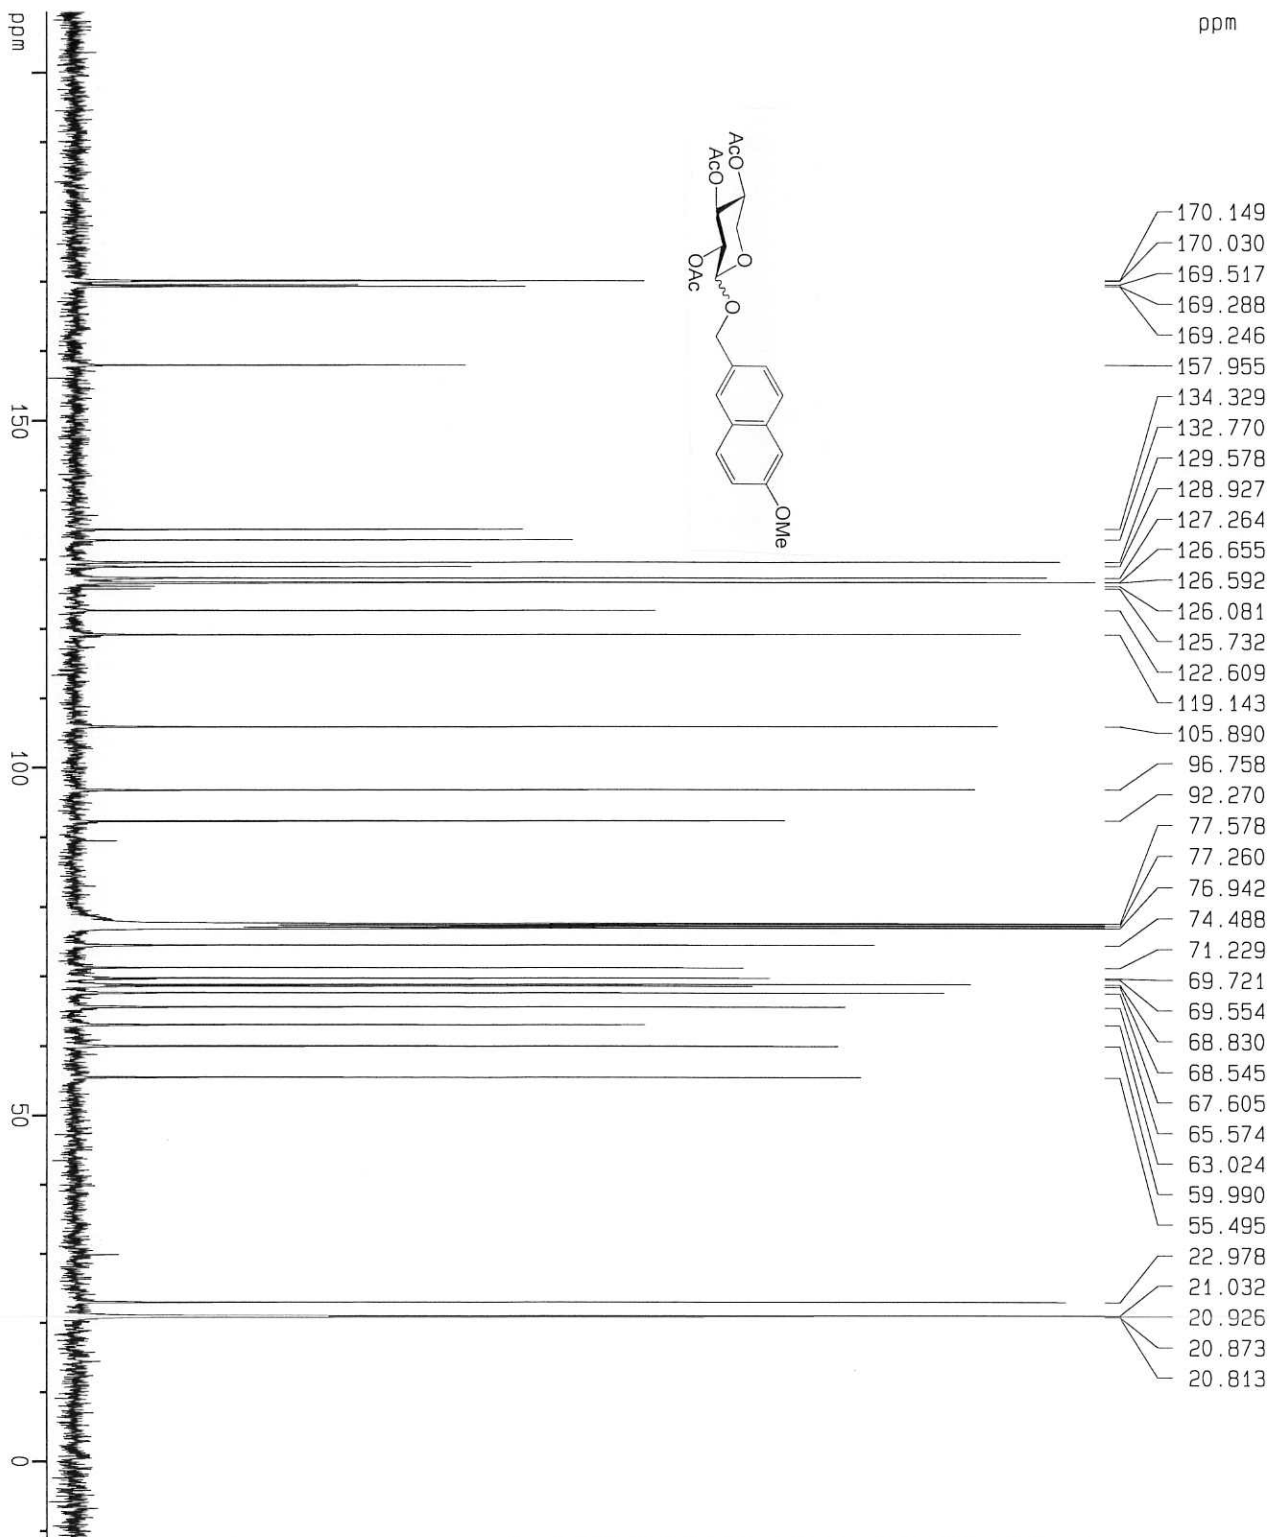

|         |
|---------|
| 170.149 |
| 170.030 |
| 169.517 |
| 169.288 |
| 169.246 |
| 157.955 |
| 134.329 |
| 132.770 |
| 129.578 |
| 128.927 |
| 127.264 |
| 126.655 |
| 126.592 |
| 126.081 |
| 125.732 |
| 122.609 |
| 119.143 |
| 105.890 |
| 96.758  |
| 92.270  |
| 77.578  |
| 77.260  |
| 76.942  |
| 74.488  |
| 71.229  |
| 69.721  |
| 69.554  |
| 68.830  |
| 68.545  |
| 67.605  |
| 65.574  |
| 63.024  |
| 59.990  |
| 55.495  |
| 22.978  |
| 21.032  |
| 20.926  |
| 20.873  |
| 20.813  |

Current Data Parameters  
 NAME QZ-IV-116  
 EXPNO 9  
 PROCNO 1

F2 - Acquisition Parameters  
 Date\_ 500000  
 Time 15.33  
 INSTRUM arx400  
 PROBHD 5 mm Multinuc1  
 PULPROG zgpg30  
 TD 32768  
 SOLVENT CDCl3  
 NS 11415  
 DS 2  
 SMH 25000.000 Hz  
 FIDRES 0.762939 Hz  
 AQ 0.6554100 sec  
 RG 45500  
 DW 20.000 usec  
 DE 27.14 usec  
 TE 300.0 K  
 D12 0.00002000 sec  
 DLS 20.00 dB  
 CPOPRG waltz16  
 P31 100.00 usec  
 D1 0.40000001 sec  
 P1 6.75 usec  
 DE 27.14 usec  
 SF01 100.6231179 MHz  
 NUCLEUS 13C  
 D11 0.03000000 sec

F2 - Processing parameters  
 SI 16384  
 SF 100.6127490 MHz  
 MDW EM  
 SSB 0  
 LB 2.00 Hz  
 GB 0  
 PC 1.40

1D NMR plot parameters  
 CX 20.00 cm  
 F1P 208.747 ppm  
 F1 21002.59 Hz  
 F2P -10.992 ppm  
 F2 -1105.93 Hz  
 PPKCM 10.98694 ppm/cm  
 HZCM 1105.42627 Hz/cm

1H NMR of Methyl-2,3,4-Tri-benzoyl-O-6-(6-Methoxy-2-naphthalenylmethyl)- $\alpha$ -D-mannopyranoside (13)

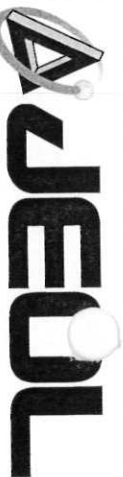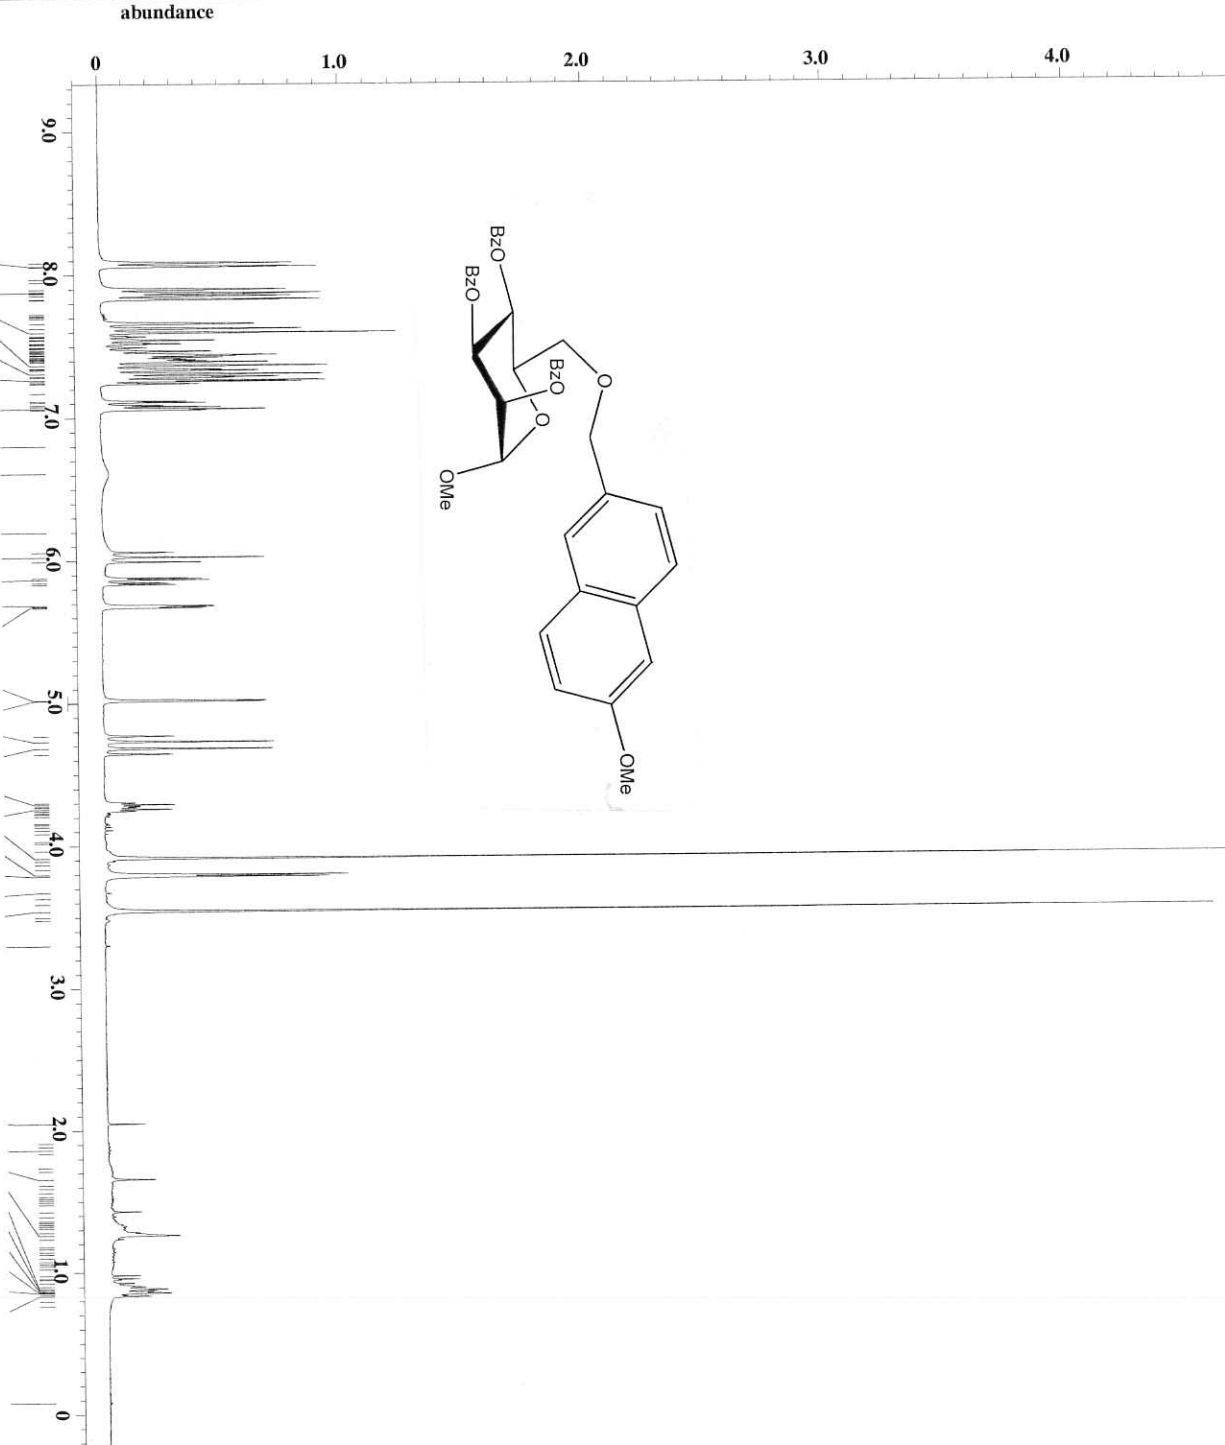

X : parts per Million : 1H

- 8.0617
- 7.8763
- 7.5982
- 7.3681
- 7.3097
- 7.2651
- 7.0659
- 6.8038
- 6.6127
- 6.1984
- 6.0267
- 5.8687
- 5.6879
- 5.6822
- 5.0229
- 5.0172
- 4.7322
- 4.6841
- 4.2915
- 4.2583
- 3.9138
- 3.7993
- 3.7868
- 3.6723
- 3.5430
- 3.3015
- 2.0459
- 1.8627
- 1.6567
- 1.2607
- 0.8853
- 0.8773
- 0.8670
- 0.8590
- 0.8555
- 0.8349
- 0.0818

```

Filename = 0406120Z-III-57single
Author = grzhang
Experiment = single_pulse_ext2
Sample_id = 0406120Z-III-57single
Solvent = CHLOROFORM-D
Creation_time = 6-APR-2012 10:46:27
Revision_time = 6-APR-2012 10:40:27
Current_time = 6-APR-2012 10:40:37

Comment = single_pulse
Data_format = ID_COMPLEX
Dim_size = 13107
Dim_title = 1H
Dim_units = [ppm]
Dimensions = X
Site = ECX 300
Spectrometer = ECX-300

Field_strength = 7.0586013[T] (300 [MHz]
X_acq_duration = 2.90717696[ls]
X_domain = 1H
X_freq = 300.52965592[MHz]
X_offset = 5[ppm]
X_points = 16384
X_prescans = 1
X_resolution = 0.34397631[Hz]
X_sweep = 5.63570784[kHz]
Irr_domain = 1H
Irr_freq = 300.52965592[MHz]
Irr_offset = 5[ppm]
Irr_domain = 1H
Tri_domain = 300.52965592[MHz]
Tri_freq = 5[ppm]
Tri_offset = FALSE
Clipped = FALSE
Mod_return = 1
Scans = 1
Total_scans = 8
X_90_width = 13.43[us]
X_acq_time = 2.90717696[ls]
X_angle = 45[deg]
X_db = 3[db]
X_atn = 6.715[us]
X_pulse = Off
Irr_mode = Off
Dante_presat = FALSE
Initial_wait = 1[ls]
Recvr_gain = 40
Relaxation_delay = 5[ls]
Repetition_time = 7.90717696[ls]
Temp_get = 22.6[dc]
    
```

<sup>13</sup>C NMR of Methyl-2,3,4-Tri-benzoyl-O-6-(6-Methoxy-2-naphthalenylmethyl)- $\alpha$ -D-mannopyranoside (13)

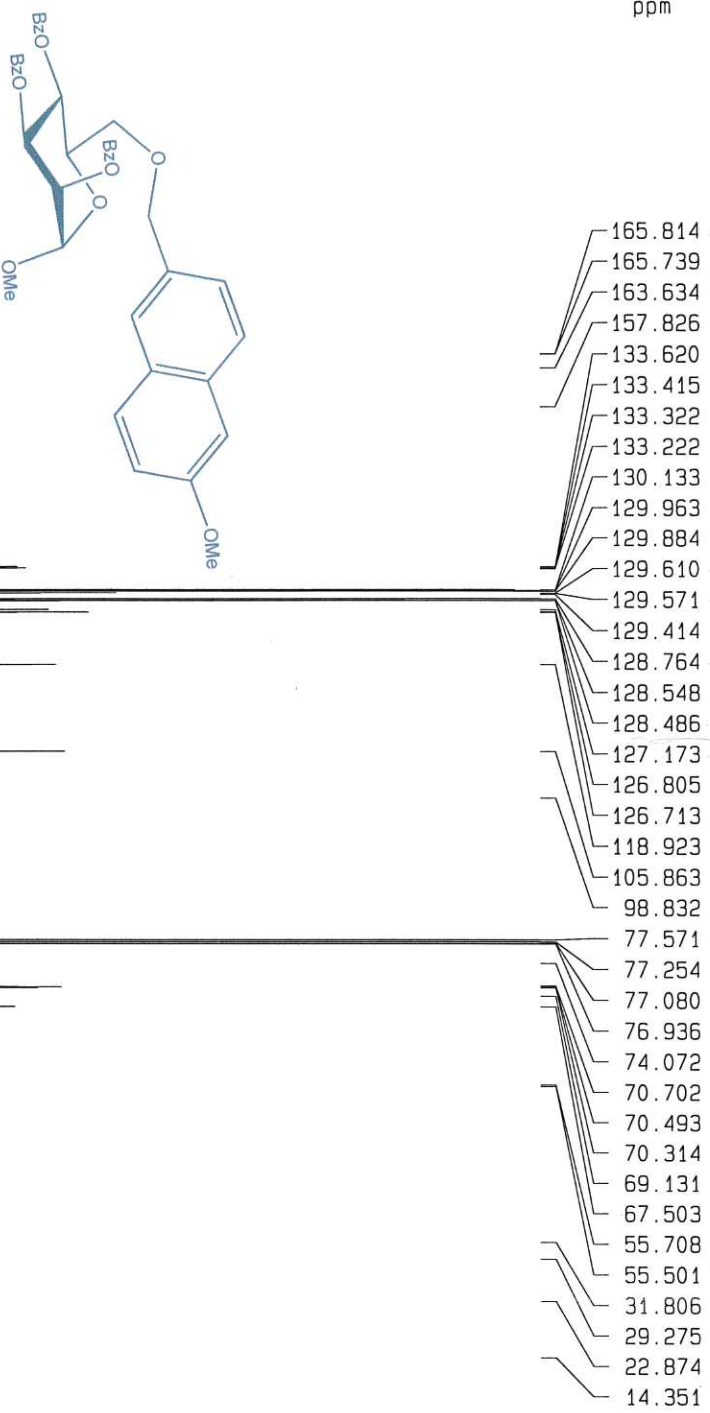

- 165.814
- 165.739
- 163.634
- 157.826
- 133.620
- 133.415
- 133.322
- 133.222
- 130.133
- 129.963
- 129.884
- 129.610
- 129.571
- 129.414
- 128.764
- 128.548
- 128.486
- 127.173
- 126.805
- 126.713
- 118.923
- 105.863
- 98.832
- 77.571
- 77.254
- 77.080
- 76.936
- 74.072
- 70.702
- 70.493
- 70.314
- 69.131
- 67.503
- 55.708
- 55.501
- 31.806
- 29.275
- 22.874
- 14.351

ppm

Current Data Parameters  
 NAME QZ-111-57C13  
 EXPNO 9  
 PROCNO 1

F2 - Acquisition Parameters  
 Date\_ 500000  
 Time 12.11  
 INSTRUM arx400  
 PROBHD 5 mm Multinuc1  
 PULPROG zgpg30  
 TD 32768  
 SOLVENT CDCl3  
 NS 16004  
 DS 2  
 SWH 25000.000 Hz  
 FIDRES 0.762939 Hz  
 AQ 0.6554100 sec  
 RG 45500  
 DW 20.000 usec  
 DE 27.14 usec  
 TE 300.0 K  
 D12 0.00002000 sec  
 DLS 20.00 dB  
 CPPPRG waltz16  
 P31 100.00 usec  
 D1 0.40000001 sec  
 P1 6.75 usec  
 DE 27.14 usec  
 SFO1 100.6231179 MHz  
 NUCLEUS 13C  
 D11 0.030000000 sec

F2 - Processing parameters  
 SI 16384  
 SF 100.6127490 MHz  
 MDW EM  
 SSB 0  
 LB 2.00 Hz  
 GB 0  
 PC 1.40

1D NMR plot parameters  
 CX 20.00 cm  
 F1P 220.000 ppm  
 F1 22134.80 Hz  
 F2P -10.000 ppm  
 F2 -1006.13 Hz  
 PPMCM 11.50000 ppm/cm  
 HZCM 1157.04663 Hz/cm

<sup>1</sup>H NMR of 1,2-O-isopropylidene-6-(4-methyl-umbelliferyl)-O- $\alpha$ -D-xylofuranose (16)

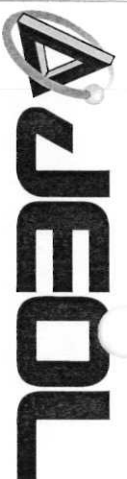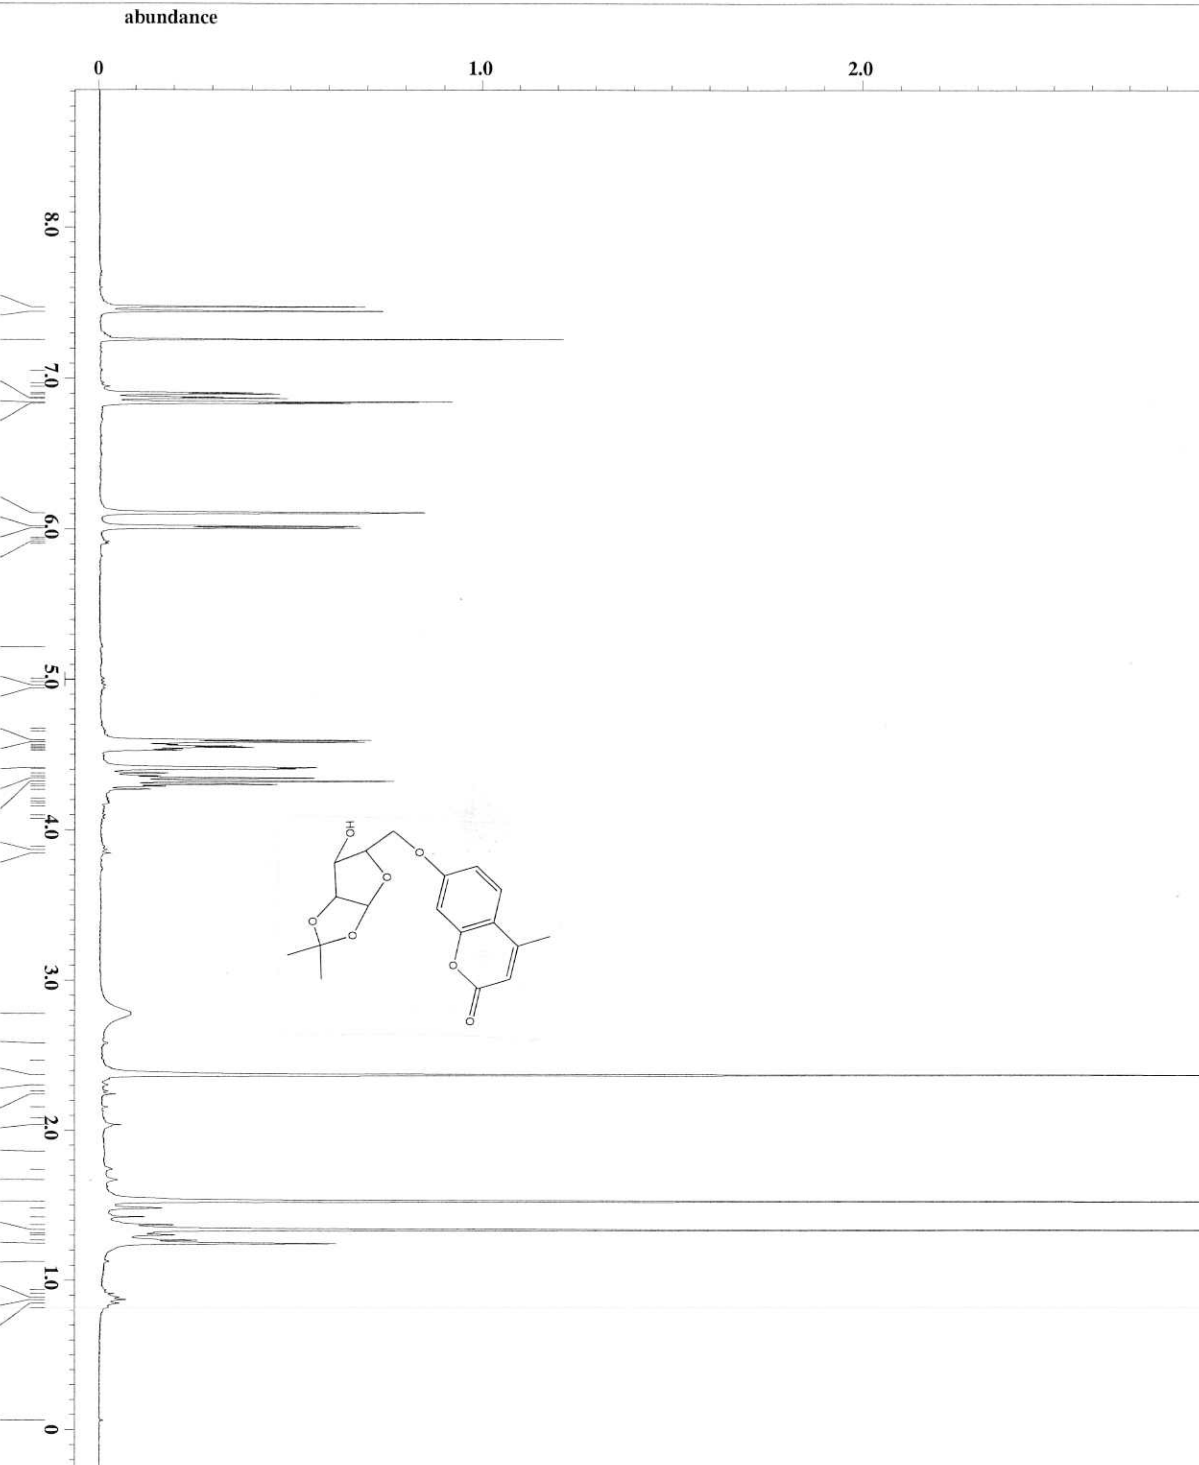

parts per Million : 1H

- 7.4734
- 7.4437
- 7.2571
- 6.8656
- 6.8416
- 6.8336
- 6.1079
- 6.0187
- 6.0072
- 5.9168
- 5.2175
- 4.9634
- 4.9428
- 4.5960
- 4.5834
- 4.4140
- 4.3442
- 4.3236
- 3.8680
- 3.8440
- 2.7795
- 2.5838
- 2.3721
- 2.3034
- 2.2416
- 2.0367
- 1.8605
- 1.6716
- 1.5285
- 1.3385
- 1.2470
- 1.1256
- 0.8853
- 0.8704
- 0.8464
- 0.0612

```

Filename = 12151202-IT1-236111.s1
Author = qzhang
Experiment = single_pulse.ex2
Sample_id = 12151202-IT1-236111.s1
Solvent = CHLOROFORM-D
Creation_time = 15-DEC-2012 10:25:43
Revision_time = 15-DEC-2012 10:21:03
Current_time = 15-DEC-2012 10:21:11

Comment = single_pulse
Data_format = 1D COMPLEX
Dim_size = 13107
Dim_title = 1H
Dim_units = [ppm]
Dimensions = X
Site = ECX 300
Spectrometer = ECX-300

Field_strength = 7.05860131[M] (300[MHz]
X_acq_duration = 2.90717696[fs]
X_domain = 1H
X_freq = 300.52965592[MHz]
X_offset = 5 [ppm]
X_points = 16384
X_prescans = 1
X_resolution = 0.34397631[Hz]
X_sweep = 5.63570784 [kHz]
Irr_domain = 1H
Irr_freq = 300.52965592 [MHz]
Irr_offset = 5 [ppm]
Irr_domain = 1H
Tri_freq = 300.52965592 [MHz]
Tri_offset = 5 [ppm]
Clipped = FALSE
Mod_return = 1
Scans = 8
Total_scans = 8

X_90_width = 13.43[us]
X_acq_time = 2.90717696[fs]
X_angle = 45[deg]
X_atn = 3[db]
X_pulse = 6.715[us]
Irr_mode = Off
Tri_mode = Off
Dante_presat = FALSE
Initial_wait = 1[fs]
Recvr_gain = 44
Relaxation_delay = 5[fs]
Repetition_time = 7.90717696[fs]
Temp_get = 23.3 [dC]
    
```

<sup>13</sup>C NMR of 1,2-O-isopropylidene-6-(4-methyl-umbelliferyl)-O-α-D-xylofuranose (16)

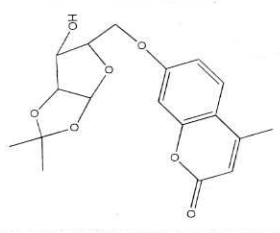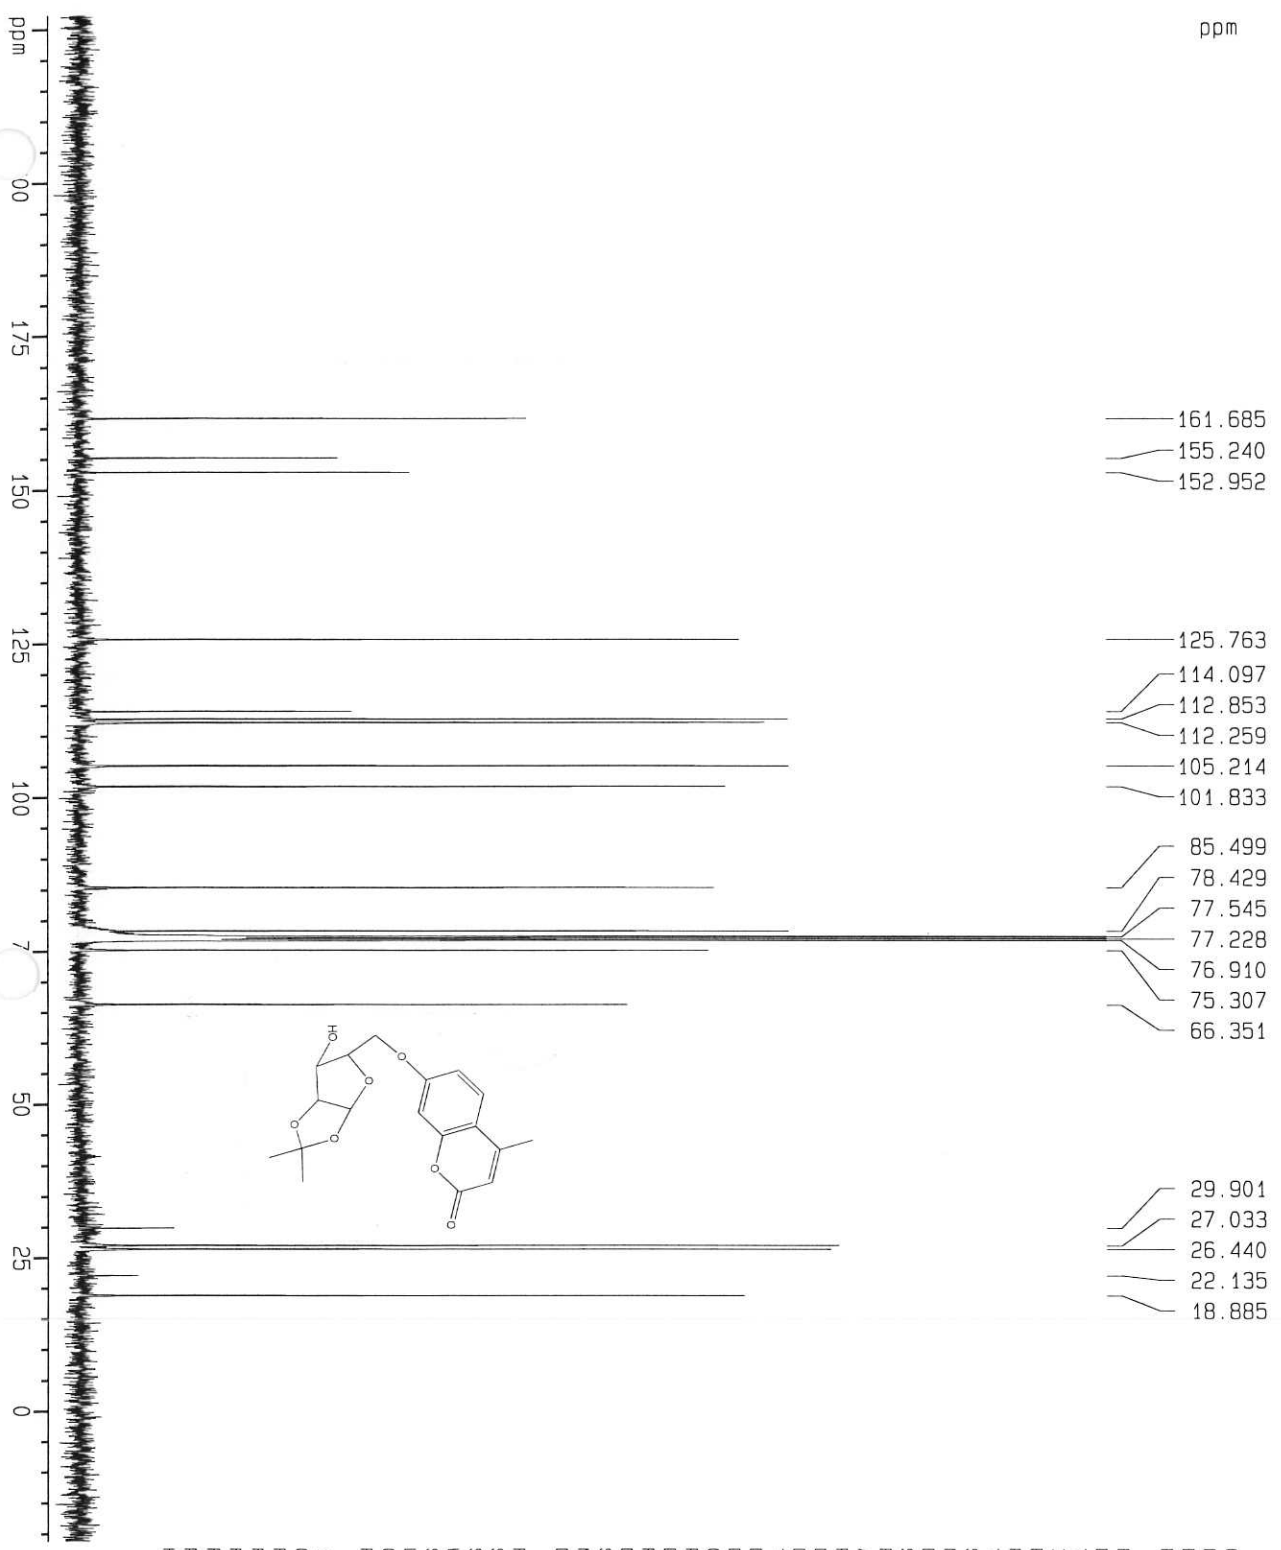

```

Current Data Parameters
NAME      GZ-111-236111
EXPNO     9
PROCNO    1

F2 - Acquisition Parameters
Date_     500000
Time      13.16
INSTRUM   arx400
PROBHD    5 mm Multinuc1
PULPROG   zgpg30
TD         32768
SOLVENT   CDCl3
NS         13877
DS         2
SMH        25000.000 Hz
FIDRES     0.762939 Hz
AQ         0.6554100 sec
RG         45500
DM         20.000 usec
DE         27.14 usec
TE         300.0 K
D12        0.0002000 sec
DL5        20.00 dB
CPDPRG6   waltz16
P31        100.00 usec
D1         0.40000001 sec
P1         6.75 usec
DE         27.14 usec
SF01       100.6231179 MHz
NUCLEUS    13C
D11        0.030000000 sec

F2 - Processing parameters
SI         16384
SF         100.6127490 MHz
MDW        EM
SSB        0
LB         2.00 Hz
GB         0
PC         1.40

1D NMR plot parameters
CX         20.00 cm
F1P        227.296 ppm
F1         22866.89 Hz
F2P        -21.181 ppm
F2         -2131.11 Hz
PPMCM      12.42387 ppm/cm
HZCM       1250.00012 Hz/cm
    
```

## II. Incubation of 4MU with Aromatic Compounds

Three aromatic adducts from the possible degradation of class III probes were used for this investigation: 3,4-dimethoxyacetophenone (**A**), 3,4-dimethoxybenzyl alcohol (**B**) and 1-(3,4-dimethoxyphenyl)ethanol (**C**). The fluorescence measure showed no quenching of 4MU from these aromatic compounds. There was only a slight decrease in fluorescence when 4MU was mixed with 3,4-dimethoxyacetophenone and no changes on the other two combinations. The results confirm that no fluorescence quenching if the degradation of class III probes occurs .

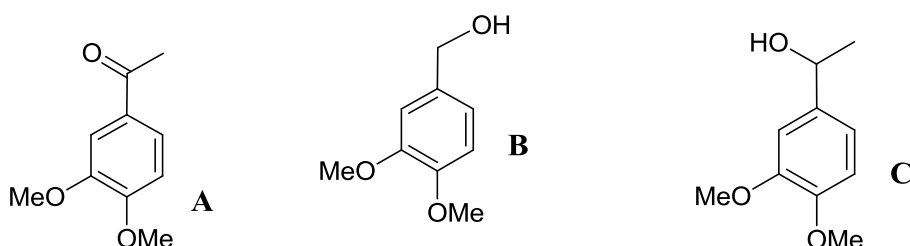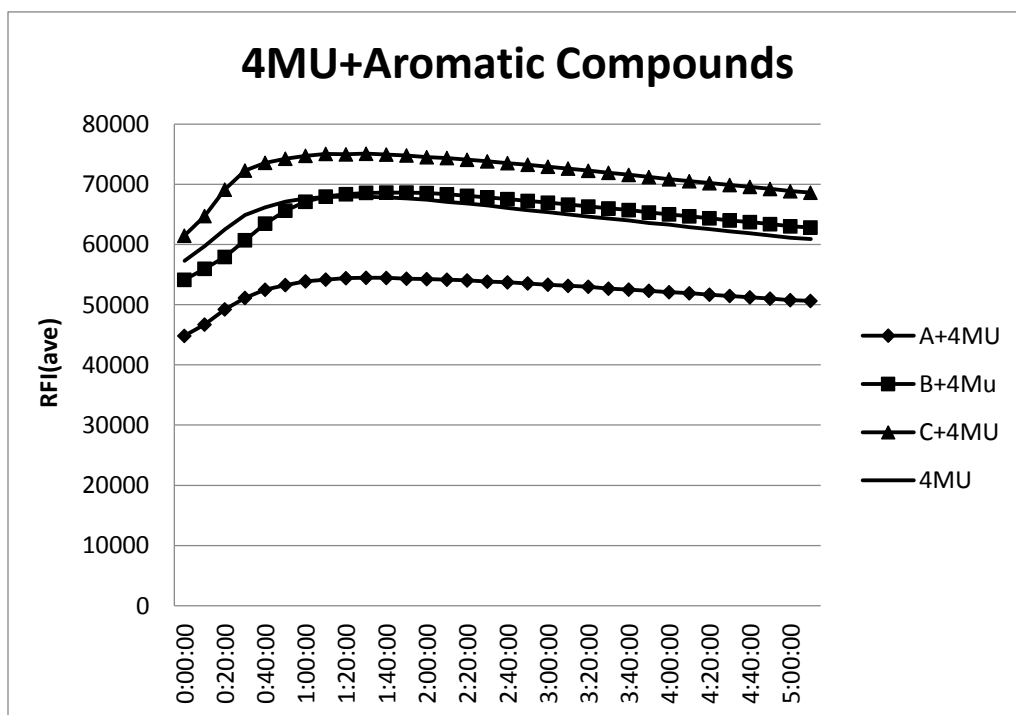

Supplement: c4gc01659a1.pdf [file c4gc01659a1.pdf]
